# Supplementary material for: PR-10, defensin and cold dehydrin genes are among those over expressed in Oxytropis (Fabaceae) species adapted to the arctic
Source: Springer Nature journal article supplement (doi:10.1007/s10142-011-0223-6), 2011-04-16
Supplement: MOESM2 [file 10142_2011_223_MOESM2_ESM.doc]

**Supplementary Table S2** Primers used for real-time reverse transcription PCR (RT-PCR) from *Oxytropis* plantlets cDNA.

| Gene name | Forward primer (5’ – 3’) | Reverse primer (5’ – 3’) | Annealing temperature | Amplicon length | Sequence accession numbers |
| --- | --- | --- | --- | --- | --- |
| arctic.contig13/36 (PR-10 family) | PR10_13_1f CTCCAAGTCATCAATTCATCACCAC | PR10_36_4r TTAGGATTGGCCAAAACATAACC | 63 C | 397 bp | HM107140 HM107141 HM107142 HM107143 |
| arctic.contig61 (PR-10 family) | PR10_61_1f CAACACAACACAACWGCCAACAA | PR10_61_16r AAACGTAACCCTCGATAGCCT | 63 C | 524 bp | HM107135 HM107136 HM107137 HM107138 HM107139 |
| arctic.contig47 (cold dehydrin) | arct_cold47_7f GAGAACACTATGGTGAACCACAT | arct_cold47_8r TGCTGCTGCTATCATGACCATGC | 63 C | 288 bp | HM107144 HM107145 HM107146 HM107147 |
| temperate.contig119 (lhcb1, light harvesting protein b 1) | lhcb1_119_5f GCCAAAAACCGTGAACTCGAAG | lhcb1_119_7r TGGGTCAACAACCTCACCAAGA | 63 C | 288 bp | HM107148 HM107149 HM107150 HM107151 |
| actin (as normalizing gene) | actinO_7f ATGTGCCTGCCATGTATGTTGC | actinO_8r GCAAGATCCAAACGAAGGATGG | 63 C | 220 bp | HM107152 HM107153 HM107154 HM107155 |
