# Supplementary material for: PR-10, defensin and cold dehydrin genes are among those over expressed in Oxytropis (Fabaceae) species adapted to the arctic
Source: Springer Nature journal article supplement (doi:10.1007/s10142-011-0223-6), 2011-04-16
Supplement: MOESM4 [file 10142_2011_223_MOESM4_ESM.doc]

**Supplementary table S4** Annotation of the 368 genes (contigs and singlets) from a temperate-enriched *Oxytropis* subtracted plantlet library.

|  | Temperate unique sequence name | Number of ESTs in contigs | Gene putative identity | Length | Number of BLAST hits | Max  e-value | Similarity mean | Number of GO terms | GO terms | Enzyme | Member sequences | GenBank Accession Numbers |
| --- | --- | --- | --- | --- | --- | --- | --- | --- | --- | --- | --- | --- |
|  |  |  | **Energy** |  |  |  |  |  |  |  |  |  |
|  |  |  | **photosystems** |  |  |  |  |  |  |  |  |  |
|  | Otpt1_0074_HFY328_055.ab1 | 1 | Chlorophyll a/b-binding protein; LHCA1; photosystem I | 643 | 25 | 1.61E-83 | 92.28% | 9 | P:photosynthesis, light harvesting; C:photosystem II; F:magnesium ion binding; P:protein-chromophore linkage; F:chlorophyll binding; C:integral to membrane; C:chloroplast; C:thylakoid; C:photosystem I |  |  | GW697586 |
|  | temperate.fasta.screen.Contig110 | 5 | Chlorophyll a b-binding protein; LHCA3 psi type III; 24kD light-harvesting protein of photosystem I | 764 | 25 | 6.64E-91 | 86.76% | 9 | P:photosynthesis, light harvesting; C:photosystem II; F:magnesium ion binding; P:protein-chromophore linkage; F:chlorophyll binding; C:integral to membrane; C:chloroplast; C:thylakoid; C:photosystem I |  | Otpt1_0276_HFY330_081.ab1; Otpt1_0784_CZ1855_064.ab1; Otpt1_0762_CZ1855_046.ab1; Otpt1_1002_CH0101_021.ab1; Otpt1_0331_CZ1835_028.ab1 | GW697663  GW697846  GW697840  GW697925  GW697685 |
|  | temperate.fasta.screen.Contig45 | 2 | Chlorophyll a b-binding protein cp29; LHCB4; chloroplast protein encoded by nuclear genome | 996 | 25 | 3.04E-146 | 89.32% | 5 | C:plastoglobule; C:chloroplast envelope; P:photosynthesis, light harvesting; C:light-harvesting complex; C:chloroplast thylakoid membrane |  | Otpt1_0900_CH0101_036.ab1; Otpt1_0072_HFY328_059.ab1 | GW697890  GW697584 |
|  | temperate.fasta.screen.Contig99 | 4 | Chlorophyll a-b binding protein P4; LHCI type III; chloroplast protein encoded by nuclear genome; Down-regulated by UV-B | 1010 | 25 | 3.55E-134 | 87.28% | 9 | P:photosynthesis, light harvesting; C:photosystem II; F:magnesium ion binding; P:protein-chromophore linkage; F:chlorophyll binding; C:integral to membrane; C:chloroplast; C:thylakoid; C:photosystem I |  | Otpt1_0144_HFY330_016.ab1; Otpt1_1259_CH0101_003.ab1; Otpt1_1466_AM21_012.ab1; Otpt1_1108_CH0101_088.ab1 | GW697612  GW698029  GW698078  GW697965 |
|  | Otpt1_1153_CH0101_041.ab1 | 1 | Chlorophyll-a b binding protein; chloroplast protein encoded by nuclear genome | 754 | 25 | 2.06E-129 | 97.24% | 9 | P:photosynthesis, light harvesting; C:photosystem II; F:magnesium ion binding; P:protein-chromophore linkage; F:chlorophyll binding; C:integral to membrane; C:chloroplast; C:thylakoid; C:photosystem I |  |  | GW697992 |
|  | Otpt1_1115_CH0101_011.ab1 | 1 | Chlorophyll a b binding protein type II; chloroplast protein encoded by nuclear genome | 840 | 25 | 1.30E-125 | 93.44% | 10 | P:photosynthesis, light harvesting; C:plasma membrane; C:photosystem II; F:magnesium ion binding; P:protein-chromophore linkage; F:chlorophyll binding; C:integral to membrane; C:chloroplast; C:thylakoid; C:photosystem I |  |  | GW697970 |
|  | Otpt1_0522_CZ1835_052.ab1 | 1 | Chlorophyll a b binding protein | 691 | 25 | 3.47E-61 | 96.76% | 9 | P:photosynthesis, light harvesting; C:photosystem II; F:magnesium ion binding; P:protein-chromophore linkage; F:chlorophyll binding; C:integral to membrane; C:chloroplast; C:thylakoid; C:photosystem I |  |  | GW697750 |
|  | temperate.fasta.screen.Contig119 | 8 | Chlorophyll a b binding protein; LHCII type I CAB-AB80; Lhcb1; photosystem II type I; chloroplast protein encoded by nuclear genome | 957 | 25 | 6.76E-140 | 94.80% | 9 | P:photosynthesis, light harvesting; C:photosystem II; F:magnesium ion binding; P:protein-chromophore linkage; F:chlorophyll binding; C:integral to membrane; C:chloroplast; C:thylakoid; C:photosystem I |  | Otpt1_0098_HFY328_065.ab1; Otpt1_1090_CH0101_068.ab1; Otpt1_0208_HFY330_034.ab1; Otpt1_0231_HFY330_062.ab1; Otpt1_0395_CZ1835_050.ab1; Otpt1_0595_CZ1855_023.ab1; Otpt1_0937_CH0101_069.ab1; Otpt1_0799_CZ1855_069.ab1 | GW697594  GW697956  GW697637  GW697643  GW697704  GW697781  GW697904  GW697851 |
|  | temperate.fasta.screen.Contig21 | 1 | Chlorophyll a b binding protein | 609 | 25 | 1.80E-78 | 97.84% | 8 | P:photosynthesis, light harvesting; C:photosystem II; F:magnesium ion binding; P:protein-chromophore linkage; F:chlorophyll binding; C:integral to membrane; C:photosystem I; C:chloroplast thylakoid membrane |  | Otpt1_0042_HFY328_028.ab1 | GW697575 |
|  | temperate.fasta.screen.Contig98 | 4 | Chlorophyll a b binding protein type II; Cab-6; LHCB2.3; Photosystem II light harvesting complex gene 2.1; chloroplast protein encoded by nuclear genome; | 1023 | 25 | 5.26E-133 | 93.44% | 9 | P:photosynthesis, light harvesting; C:photosystem II; F:magnesium ion binding; P:protein-chromophore linkage; F:chlorophyll binding; C:integral to membrane; C:chloroplast; C:thylakoid; C:photosystem I |  | Otpt1_0044_HFY328_024.ab1; Otpt1_1115_CH0101_011.ab1; Otpt1_0165_HFY330_021.ab1; Otpt1_0522_CZ1835_052.ab1 | GW697576  GW697970  GW697621  GW697750 |
|  | temperate.fasta.screen.Contig96 | 3 | Chlorophyll a b-binding protein; chloroplast protein encoded by nuclear genome | 877 | 25 | 5.50E-114 | 86.84% | 4 | C:membrane; C:thylakoid; C:chloroplast; P:photosynthesis, light harvesting |  | Otpt1_0110_HFY328_070.ab1; Otpt1_0134_HFY330_015.ab1; Otpt1_0285_HFY330_086.ab1 | GW697597  GW697608  GW697667 |
|  | temperate.fasta.screen.Contig92 | 3 | Chlorophyll a b-binding protein; chloroplast protein encoded by nuclear genome | 688 | 25 | 1.13E-96 | 93.24% | 9 | P:photosynthesis, light harvesting; C:photosystem II; F:magnesium ion binding; P:protein-chromophore linkage; F:chlorophyll binding; C:integral to membrane; C:chloroplast; C:thylakoid; C:photosystem I |  | Otpt1_0114_HFY328_066.ab1; Otpt1_0263_HFY330_074.ab1; Otpt1_0389_CZ1835_052.ab1 | GW697598  GW697652  GW697703 |
|  | temperate.fasta.screen.Contig49 | 2 | Photosystem II 5 kD protein, chloroplast, also response to UV and wounding | 513 | 25 | 2.82E-42 | 84.00% | 10 | F:protein binding; C:stromule; F:carbonate dehydratase activity; P:carbon utilization; C:chloroplast; C:thylakoid; F:zinc ion binding; C:apoplast; P:one-carbon compound metabolic process; P:nitrogen compound metabolic process |  | Otpt1_0731_CZ1855_023.ab1; Otpt1_0211_HFY330_061.ab1 | GW697830  GW697639 |
|  | *Otpt1_0709_CZ1855_003.ab1 | 1 | psaB; photosystem I p700 apoprotein a2 | 658 | 25 | 3.46E-121 | 99.20% | 14 | F:electron carrier activity; F:iron ion binding; P:transport; P:oxidation reduction; F:magnesium ion binding; P:protein-chromophore linkage; F:chlorophyll binding; F:4 iron, 4 sulfur cluster binding; C:integral to membrane; C:chloroplast; C:thylakoid; C:photosystem I; P:photosynthesis; P:electron transport |  |  | GW697826 |
|  | temperate.fasta.screen.Contig55 | 2 | psaD; photosystem i subunit | 773 | 25 | 4.74E-76 | 81.56% | 5 | C:thylakoid; C:photosystem I reaction center; F:protein binding; C:chloroplast; P:photosynthesis |  | Otpt1_0273_HFY330_085.ab1; Otpt1_1204_CH0101_077.ab1 | GW697661  GW698011 |
|  | temperate.fasta.screen.Contig12 | 1 | psaE family; reaction center subunit III | 571 | 25 | 8.43E-37 | 78.92% | 5 | C:thylakoid; F:catalytic activity; C:photosystem I reaction center; C:chloroplast; P:photosynthesis |  | Otpt1_1033_CH0101_033.ab1 | GW697939 |
|  | temperate.fasta.screen.Contig56 | 2 | psaE family; reaction center subunit iii | 673 | 25 | 1.38E-35 | 79.96% | 5 | C:thylakoid; F:catalytic activity; C:photosystem I reaction center; C:chloroplast; P:photosynthesis |  | Otpt1_1403_CH0101_050.ab1; Otpt1_1462_AM21_003.ab1 | GW698054  GW698074 |
|  | temperate.fasta.screen.Contig109 | 4 | psaE family; Photosystem I reaction center subunit IV A, chloroplast protein encoded by nuclear genome | 683 | 25 | 1.99E-29 | 87.40% | 5 | C:thylakoid; F:catalytic activity; C:photosystem I reaction center; C:chloroplast; P:photosynthesis |  | Otpt1_1363_CH0101_045.ab1; Otpt1_0290_CZ1835_011.ab1; Otpt1_1174_CH0101_061.ab1; Otpt1_1119_CH0101_003.ab1 | GW698038  GW697671  GW698002  GW697972 |
|  | temperate.fasta.screen.Contig4 | 1 | psaH; photosystem I protein | 617 | 25 | 1.43E-62 | 86.00% | 5 | C:integral to membrane; C:thylakoid; C:photosystem I reaction center; C:chloroplast; P:photosynthesis |  | Otpt1_0853_CH0101_014.ab1 | GW697868 |
|  | temperate.fasta.screen.Contig16 | 1 | psaH; photosystem I protein | 599 | 25 | 3.46E-55 | 82.60% | 5 | C:integral to membrane; C:thylakoid; C:photosystem I reaction center; C:chloroplast; P:photosynthesis |  | Otpt1_0327_CZ1835_032.ab1 | GW697683 |
|  | temperate.fasta.screen.Contig25 | 1 | psaK; photosystem I reaction center subunit x | 732 | 25 | 9.34E-47 | 84.72% | 5 | C:integral to membrane; C:photosystem I; C:thylakoid; C:chloroplast; P:photosynthesis |  | Otpt1_0313_CZ1835_004.ab1 | GW697677 |
|  | temperate.fasta.screen.Contig33 | 1 | psaK; photosystem I reaction center subunit x | 637 | 25 | 6.90E-47 | 85.56% | 5 | C:integral to membrane; C:photosystem I; C:thylakoid; C:chloroplast; P:photosynthesis |  | Otpt1_0414_CZ1835_076.ab1 | GW697710 |
|  | temperate.fasta.screen.Contig83 | 3 | psaL; photosystem I reaction subunit xi; chloroplast protein encoded by nuclear genome | 817 | 25 | 4.00E-92 | 88.00% | 5 | C:integral to membrane; C:thylakoid; C:photosystem I reaction center; C:chloroplast; P:photosynthesis |  | Otpt1_0793_CZ1855_079.ab1; Otpt1_1114_CH0101_013.ab1; Otpt1_1070_CH0101_054.ab1 | GW697848  GW697969  GW697949 |
|  | temperate.fasta.screen.Contig120 | 9 | psaN; photosystem i reaction centre subunit precursor; calmodulin binding; unknown function ; chloroplast protein encoded by nuclear genome | 691 | 25 | 7.23E-59 | 81.56% | 5 | C:photosystem I; C:thylakoid membrane; F:protein binding; C:chloroplast; P:photosynthesis |  | Otpt1_1519_AM21_036.ab1; Otpt1_1457_AM21_013.ab1; Otpt1_0665_CZ1855_069.ab1; Otpt1_1113_CH0101_015.ab1; Otpt1_0129_HFY328_090.ab1; Otpt1_0152_HFY330_004.ab1; Otpt1_0077_HFY328_051.ab1; Otpt1_0967_CH0101_090.ab1; Otpt1_0130_HFY328_088.ab1 | GW698099  GW698072  GW697803  GW697968  GW697603  GW697614  GW697588  GW697914  GW697604 |
|  | temperate.fasta.screen.Contig88 | 3 | psaO, membrane protein 16kda; thylakoid; chloroplast protein encoded by nuclear genome | 707 | 25 | 2.66E-56 | 79.24% | 2 | C:thylakoid; C:plastid |  | Otpt1_0623_CZ1855_046.ab1; Otpt1_0631_CZ1855_036.ab1; Otpt1_1110_CH0101_084.ab1 | GW697792  GW697794  GW697967 |
|  | Otpt1_1023_CH0101_018.ab1 | 1 | psbM; photosystem II m protein | 345 | 1 | 3.45E-07 | 75.00% | 0 |  | - |  | GW697931 |
|  | temperate.fasta.screen.Contig47 | 2 | psbO; 33 kda subunit of oxygen evolving system of photosystem II thylakoid membrane protein; Mn stability; chloroplast protein | 551 | 25 | 4.04E-54 | 94.64% | 6 | F:manganese ion binding; C:extrinsic to membrane; F:calcium ion binding; P:photosystem II stabilization; C:chloroplast; C:oxygen evolving complex |  | Otpt1_0772_CZ1855_061.ab1; Otpt1_0543_CZ1835_066.ab1 | GW697843  GW697763 |
|  | temperate.fasta.screen.Contig115 | 6 | psbP; 23 kda subunit of oxygen evolving system of photosystem II thylakoid membrane protein; chloroplast protein encoded by nuclear genome | 911 | 25 | 5.89E-106 | 84.16% | 7 | C:chloroplast envelope; C:extrinsic to membrane; F:calcium ion binding; C:stromule; C:apoplast; P:photosynthesis; C:oxygen evolving complex |  | Otpt1_0571_CZ1855_005.ab1; Otpt1_1392_CH0101_053.ab1; Otpt1_1013_CH0101_028.ab1; Otpt1_1505_AM21_033.ab1; Otpt1_0361_CZ1835_034.ab1; Otpt1_1091_CH0101_066.ab1 | GW697776  GW698049  GW697928  GW698094  GW697693  GW697957 |
|  | temperate.fasta.screen.Contig1 | 1 | psbP; 23 kda subunit of oxygen evolving system of photosystem II thylakoid membrane protein; chloroplast protein encoded by nuclear genome | 659 | 25 | 2.50E-95 | 78.76% | 7 | C:chloroplast envelope; C:extrinsic to membrane; F:calcium ion binding; C:stromule; C:apoplast; P:photosynthesis; C:oxygen evolving complex |  | Otpt1_0365_CZ1835_057.ab1 | GW697697 |
|  | Otpt1_0329_CZ1835_030.ab1 | 1 | psbQ; oxygen evolving enhancer protein; calcium binding; light reaction; chloroplast protein encoded by nuclear genome | 661 | 25 | 3.94E-64 | 70.92% | 6 | C:chloroplast thylakoid lumen; C:extrinsic to membrane; F:calcium ion binding; P:photosynthesis; C:chloroplast thylakoid membrane; C:oxygen evolving complex |  |  | GW697684 |
|  | Otpt1_0988_CH0101_010.ab1 | 1 | psbQ; oxygen-evolving enhancer protein 3 precursor; chloroplast protein encoded by nuclear genome; only weakely similar to Otpt1_0329 | 767 | 25 | 3.13E-64 | 57.52% | 4 | C:chloroplast thylakoid lumen; P:photosynthesis, light reaction; C:chloroplast thylakoid membrane; C:oxygen evolving complex |  |  | GW697921 |
|  | temperate.fasta.screen.Contig114 | 6 | psbQ; oxygen-evolving enhancer protein 3 precursor; calcium binding; light reaction; chloroplast protein encoded by nuclear genome; only weakly similar to Otpt1_0329 or Otpt1_0988 | 829 | 25 | 6.84E-63 | 85.44% | 5 | C:extrinsic to membrane; F:calcium ion binding; C:chloroplast; P:photosynthesis; C:oxygen evolving complex |  | Otpt1_0741_CZ1855_028.ab1; Otpt1_0906_CH0101_063.ab1; Otpt1_1116_AM21_065.ab1; Otpt1_1124_CH0101_010.ab1; Otpt1_1394_CH0101_049.ab1; Otpt1_0843_CH0101_011.ab1 | GW697834  GW697892  GW698071  GW697976  GW698050  GW697865 |
|  | temperate.fasta.screen.Contig117 | 7 | psbR; photosystem II polypeptide 10 kda ; chloroplast protein encoded by nuclear genome | 710 | 25 | 2.21E-50 | 86.36% | 4 | C:oxygen evolving complex; C:thylakoid membrane; C:chloroplast; P:photosynthesis |  | Otpt1_0146_HFY330_012.ab1; Otpt1_1379_CH0101_044.ab1; Otpt1_0184_HFY330_043.ab1; Otpt1_0425_CZ1835_091.ab1; Otpt1_1414_CH0101_067.ab1; Otpt1_1083_CH0101_080.ab1; Otpt1_0249_HFY330_069.ab1 | GW697613  GW698044  GW697630  GW697714  GW698058  GW697954  GW697649 |
|  | temperate.fasta.screen.Contig27 | 1 | psbR chloroplast photosystem II 10 kDa protein; chloroplast protein encoded by nuclear genome | 270 | 0 |  |  | 0 |  | - | Otpt1_1399_CH0101_058.ab1 | GW698052 |
|  | temperate.fasta.screen.Contig84 | 3 | psbW; photosystem II reaction center chloroplast precursor | 641 | 25 | 8.86E-34 | 73.80% | 2 | C:chloroplast; C:photosystem II |  | Otpt1_0063_HFY328_044.ab1; Otpt1_1146_CH0101_024.ab1; Otpt1_0903_CH0101_034.ab1 | GW697579  GW697987  GW697891 |
|  | temperate.fasta.screen.Contig67 | 2 | psbW; photosystem ii reaction center chloroplast precursor | 641 | 25 | 3.05E-26 | 77.28% | 5 | C:integral to membrane; C:thylakoid; C:chloroplast; P:photosynthesis; C:photosystem II |  | Otpt1_0943_CH0101_076.ab1; Otpt1_0656_CZ1855_050.ab1 | GW697908  GW697800 |
|  | temperate.fasta.screen.Contig94 | 3 | psbX; photosystem II ; ultraviolet-b-repressible protein | 623 | 25 | 8.80E-28 | 76.68% | 2 | P:photosynthesis; C:photosystem II |  | Otpt1_0979_CH0101_009.ab1; Otpt1_0809_CZ1855_072.ab1; Otpt1_0789_CZ1855_056.ab1 | GW697917  GW697854  GW697847 |
|  | Otpt1_0885_CH0101_047.ab1 | 1 | psbY; Phostosystem II protein | 596 | 25 | 6.07E-28 | 78.60% | 1 | C:membrane | - |  | GW697880 |
|  |  |  | **Accessory proteins** |  |  |  |  |  |  |  |  |  |
|  | Otpt1_0381_CZ1835_058.ab1 | 1 | Magnesium-protoporphyrin IX monomethyl ester [oxidative] cyclase; leucine zipper protein with DNA binding; chloroplast | 215 | 12 | 2.54E-10 | 73.08% | 2 | F:metal ion binding; P:metabolic process |  |  | GW697700 |
|  |  |  |  |  |  |  |  |  |  |  |  |  |
|  | temperate.fasta.screen.Contig76 | 2 | petC; cytochrome b6-f complex (rieske iron-sulfur protein) (plastohydroquinone:plastocyanin oxidoreductase iron-sulfur protein); chloroplast protein encoded by nuclear genome | 939 | 25 | 1.88E-94 | 83.68% | 14 | F:plastoquinol-plastocyanin reductase activity; F:ubiquinol-cytochrome-c reductase activity; C:plasma membrane; F:electron carrier activity; F:iron ion binding; P:oxidation reduction; F:2 iron, 2 sulfur cluster binding; C:integral to membrane; C:chloroplast; P:electron transport; C:cytochrome b6f complex; P:oxidative phosphorylation; P:proton transport; | EC:1.10.99.1, EC:1.10.2.2, | Otpt1_0463_CZ1835_002.ab1; Otpt1_0554_CZ1835_081.ab1 | GW697724  GW697770 |
|  | Otpt1_0855_CH0101_010.ab1 | 1 | petC; cytochrome b6-f complex (rieske iron-sulfur protein) (plastohydroquinone:plastocyanin oxidoreductase iron-sulfur protein); chloroplast protein encoded by nuclear genome | 754 | 25 | 6.46E-99 | 84.96% | 14 | F:plastoquinol-plastocyanin reductase activity; F:ubiquinol-cytochrome-c reductase activity; C:plasma membrane; F:electron carrier activity; F:iron ion binding; P:oxidation reduction; F:2 iron, 2 sulfur cluster binding; C:integral to membrane; C:chloroplast; P:electron transport; C:cytochrome b6f complex; P:oxidative phosphorylation; P:proton transport; | EC:1.10.99.1, EC:1.10.2.2, |  | GW697870 |
|  | temperate.fasta.screen.Contig30 | 1 | petC; rieske iron-sulphur protein precursor, cytochrome C in photosystem II; chloroplast protein encoded by chloroplast genome | 603 | 25 | 1.06E-15 | 89.96% | 13 | F:plastoquinol-plastocyanin reductase activity; F:ubiquinol-cytochrome-c reductase activity; F:electron carrier activity; F:iron ion binding; P:oxidation reduction; F:2 iron, 2 sulfur cluster binding; C:integral to membrane; C:chloroplast; P:electron transport; C:cytochrome b6f complex; P:oxidative phosphorylation; P:proton transport; | - | Otpt1_0686_CZ1855_085.ab1 | GW697811 |
|  | temperate.fasta.screen.Contig108 | 4 | petE; plastocyanin –thylakoid lumen; copper ion binding; chloroplast protein encoded by nuclear genome | 691 | 25 | 5.77E-45 | 87.72% | 8 | F:copper ion binding; C:thylakoid lumen; F:electron carrier activity; P:transport; C:stromule; C:chloroplast; C:membrane; P:electron transport |  | Otpt1_0590_CZ1855_031.ab1; Otpt1_0335_CZ1835_022.ab1; Otpt1_0070_HFY328_063.ab1; Otpt1_0982_CH0101_003.ab1 | GW697778  GW697686  GW697582  GW697919 |
|  | Otpt1_1289_CH0101_030.ab1 | 1 | petM; cytochrome b6f complex subunit | 546 | 22 | 1.28E-28 | 74.95% | 1 | C:chloroplast thylakoid membrane | EC:1.10.99.1, |  | GW698034 |
|  |  |  |  |  |  |  |  |  |  |  |  |  |
|  | Otpt1_0907_CH0101_061.ab1 | 1 | Thioredoxin h; act on sulfur group of donors | 563 | 25 | 8.57E-39 | 83.24% | 7 | P:cell redox homeostasis; C:cytoplasm; F:electron carrier activity; F:protein disulfide oxidoreductase activity; P:glycerol ether metabolic process; P:transport; P:electron transport |  |  | GW697893 |
|  | Otpt1_0911_CH0101_055.ab1 | 1 | Thioredoxin m; chloroplast precursor | 416 | 25 | 9.71E-31 | 93.16% | 8 | F:electron carrier activity; F:protein binding; P:cell redox homeostasis; P:glycerol ether metabolic process; P:transport; C:chloroplast; F:protein disulfide oxidoreductase activity; P:electron transport |  |  | GW697894 |
|  |  |  | **Electron transport** |  |  |  |  |  |  |  |  |  |
|  | temperate.fasta.screen.Contig77 | 2 | Chloroplast ferredoxin I | 770 | 25 | 1.86E-48 | 82.24% | 10 | P:ferredoxin metabolic process; F:ferrous iron binding; F:electron carrier activity; F:protein binding; P:transport; C:stromule; F:2 iron, 2 sulfur cluster binding; C:chloroplast; P:electron transport chain; P:electron transport |  | Otpt1_1178_CH0101_055.ab1; Otpt1_1132_CH0101_027.ab1 | GW698004  GW697980 |
|  | Otpt1_0188_HFY330_037.ab1 | 1 | Chloroplast ferredoxin-nadp | 586 | 25 | 5.15E-93 | 83.96% | 10 | F:NADP binding; F:electron carrier activity; P:transport; P:oxidation reduction; C:thylakoid membrane; F:ferredoxin-NADP+ reductase activity; F:FAD binding; C:chloroplast; P:photosynthesis; P:electron transport | EC:1.18.1.2, |  | GW697632 |
|  | Otpt1_1446_CH0101_092.ab1 | 1 | Chloroplast ferredoxin-nadp+ reductase; very weak similiar similar to Otpt1_0188 | 660 | 25 | 1.87E-90 | 87.96% | 13 | C:chloroplast envelope; F:NADP binding; F:electron carrier activity; F:protein binding; P:transport; P:oxidation reduction; C:stromule; C:thylakoid membrane; F:ferredoxin-NADP+ reductase activity; F:FAD binding; C:apoplast; P:photosynthesis; P:electron transport | EC:1.18.1.2, |  | GW698065 |
|  | temperate.fasta.screen.Contig63 | 2 | ferredoxin NADP+ reductase; chloroplast | 458 | 25 | 5.17E-32 | 96.60% | 13 | C:chloroplast envelope; F:NADP binding; F:electron carrier activity; F:protein binding; P:transport; P:oxidation reduction; C:stromule; C:thylakoid membrane; F:ferredoxin-NADP+ reductase activity; F:FAD binding; C:apoplast; P:photosynthesis; P:electron transport | EC:1.18.1.2, | Otpt1_0322_CZ1835_023.ab1; Otpt1_0465_CZ1835_029.ab1 | GW697680  GW697725 |
|  | temperate.fasta.screen.Contig116 | 6 | Chloroplast precursor | 719 | 25 | 3.74E-53 | 81.92% | 10 | C:chloroplast thylakoid lumen; F:copper ion binding; F:DNA topoisomerase (ATP-hydrolyzing) activity; F:electron carrier activity; P:transport; C:DNA topoisomerase complex (ATP-hydrolyzing); C:stromule; P:DNA topological change; C:membrane; P:electron transport |  | Otpt1_0239_HFY330_050.ab1; Otpt1_0513_CZ1835_049.ab1; Otpt1_1021_CH0101_020.ab1; Otpt1_0065_HFY328_040.ab1; Otpt1_0645_CZ1855_049.ab1; Otpt1_0545_CZ1835_093.ab1 | GW697647  GW697746  GW697930  GW697580  GW697798  GW697765 |
|  | Otpt1_1490_AM21_022.ab1 | 1 | Desaturase-like protein; chlorophyll biosynthesis; magnesium-protoporphyrin IX monomethyl ester | 500 | 25 | 8.96E-59 | 95.36% | 7 | F:iron ion binding; F:magnesium-protoporphyrin IX monomethyl ester (oxidative) cyclase activity; P:oxidation reduction; P:chlorophyll biosynthetic process; C:chloroplast; C:membrane; P:photosynthesis | EC:1.14.13.81, |  | GW698089 |
|  | Otpt1_0915_CH0101_051.ab1 | 1 | Magnesium-chelatase subunit; mg-protoporphyrin ix chelatase; chlorophyll biosynthesis; also nucleoside-triphosphatase activity | 607 | 25 | 2.78E-39 | 92.96% | 7 | F:magnesium chelatase activity; P:chlorophyll biosynthetic process; C:stromule; F:ATP binding; F:nucleoside-triphosphatase activity; P:photosynthesis; C:magnesium chelatase complex | EC:6.6.1.1, EC:3.6.1.15, |  | GW697895 |
|  |  |  | **Proton transport** |  |  |  |  |  |  |  |  |  |
|  | Otpt1_1109_CH0101_086.ab1 | 1 | ATP synthase (gamma subunit) | 722 | 25 | 1.59E-89 | 85.08% | 7 | C:proton-transporting ATP synthase complex, catalytic core F(1); F:hydrogen ion transporting ATP synthase activity, rotational mechanism; P:ATP synthesis coupled proton transport; F:metal ion binding; C:thylakoid; F:hydrogen ion transporting ATPase activity, rotational mechanism; C:chloroplast | EC:3.6.3.14, |  | GW697966 |
|  |  |  |  |  |  |  |  |  |  |  |  |  |
|  |  |  | **Carbon fixation** |  |  |  |  |  |  |  |  |  |
|  | temperate.fasta.screen.Contig118 | 8 | Ribulose-bisphosphate carboxylase small subunit | 711 | 25 | 4.75E-85 | 85.68% | 7 | P:reductive pentose-phosphate cycle; F:ribulose-bisphosphate carboxylase activity; F:monooxygenase activity; P:photorespiration; P:oxidation reduction; C:chloroplast ribulose bisphosphate carboxylase complex; P:glyoxylate metabolic process | EC:4.1.1.39, | Otpt1_0212_HFY330_059.ab1; Otpt1_0156_HFY330_031.ab1; Otpt1_0491_CZ1835_037.ab1; Otpt1_1097_CH0101_085.ab1; Otpt1_1131_CH0101_029.ab1; Otpt1_0606_CZ1855_022.ab1; Otpt1_0181_HFY330_018.ab1; Otpt1_0734_CZ1855_017.ab1 | GW697640  GW697616  -  GW697960  GW697979  GW697787  GW697627  GW697832 |
|  | temperate.fasta.screen.Contig90 | 3 | Ribulose-bisphosphate carboxylase small subunit | 704 | 25 | 5.10E-84 | 85.44% | 7 | P:reductive pentose-phosphate cycle; F:ribulose-bisphosphate carboxylase activity; F:monooxygenase activity; P:photorespiration; P:oxidation reduction; C:chloroplast ribulose bisphosphate carboxylase complex; P:glyoxylate metabolic process | EC:4.1.1.39, | Otpt1_0289_CZ1835_013.ab1; Otpt1_1508_AM21_048.ab1; Otpt1_1218_CH0101_070.ab1 | GW697670  GW698095  GW698017 |
|  | temperate.fasta.screen.Contig20 | 1 | Ribulose-bisphosphate carboxylase small subunit | 660 | 25 | 3.21E-82 | 85.80% | 7 | P:reductive pentose-phosphate cycle; F:ribulose-bisphosphate carboxylase activity; F:monooxygenase activity; P:photorespiration; P:oxidation reduction; C:chloroplast ribulose bisphosphate carboxylase complex; P:glyoxylate metabolic process | EC:4.1.1.39, | Otpt1_0527_CZ1835_075.ab1 | GW697753 |
|  | temperate.fasta.screen.Contig57 | 2 | Rubisco activase | 690 | 25 | 8.39E-124 | 96.24% | 5 | F:ribulose-bisphosphate carboxylase activity; F:ATP binding; C:chloroplast ribulose bisphosphate carboxylase complex; P:carbon utilization by fixation of carbon dioxide; P:glyoxylate metabolic process | EC:4.1.1.39, | Otpt1_0277_HFY330_096.ab1; Otpt1_1129_CH0101_002.ab1 | GW697664  GW697977 |
|  | Otpt1_0688_CZ1855_083.ab1 | 1 | Ribulose bisphosphate carboxylase oxygenase activase large protein isoform; chloroplast | 337 | 25 | 8.26E-22 | 81.96% | 5 | F:ribulose-bisphosphate carboxylase activity; F:ATP binding; C:chloroplast ribulose bisphosphate carboxylase complex; P:carbon utilization by fixation of carbon dioxide; P:glyoxylate metabolic process | EC:4.1.1.39, |  | GW697812 |
|  | Otpt1_1018_CH0101_022.ab1 | 1 | Ribulose bisphosphate carboxylase oxygenase activase large protein isoform; rubisco activase; chloroplast | 512 | 25 | 9.05E-25 | 80.12% | 11 | F:ribulose-bisphosphate carboxylase activity; F:protein binding; C:cell wall; C:stromule; F:ATP binding; C:thylakoid; C:nucleus; C:apoplast; C:chloroplast ribulose bisphosphate carboxylase complex; P:carbon utilization by fixation of carbon dioxide; P:glyoxylate metabolic process | EC:4.1.1.39, |  | GW697929 |
|  |  |  | **Oxydative phosphorylation** |  |  |  |  |  |  |  |  |  |
|  | Otpt1_1523_AM21_061.ab1 | 1 | Ubiquinol-cytochrome c reductase-like protein | 614 | 25 | 6.78E-49 | 88.12% | 8 | C:mitochondrial respiratory chain complex III; F:ubiquinol-cytochrome-c reductase activity; P:mitochondrial electron transport, ubiquinol to cytochrome c; F:electron transporter, transferring electrons within CoQH2-cytochrome c reductase complex activity; C:plastid; P:electron transport; P:proton transport; | EC:1.10.2.2, |  | GW698101 |
|  | Otpt1_0923_CH0101_058.ab1 | 1 | Vacuolar proton pump subunit e (v-atpase subunit e) (-1); membranes; proton transport | 759 | 25 | 4.12E-101 | 89.16% | 7 | C:cytosolic ribosome; C:vacuole; C:proton-transporting two-sector ATPase complex; C:plasma membrane; P:proton transport; F:hydrogen ion transporting ATPase activity, rotational mechanism; P:oxidative phosphorylation | EC:3.6.3.14, |  | GW697899 |
|  |  |  |  |  |  |  |  |  |  |  |  |  |
|  |  |  | **Carbohydrates** |  |  |  |  |  |  |  |  |  |
|  |  |  | **Glycolysis and gluconoegenesis** |  |  |  |  |  |  |  |  |  |
|  | Otpt1_1416_CH0101_065.ab1 | 1 | Fructose-bisphosphate aldolase; gluconeogenesis, pentose phosphate | 613 | 25 | 2.76E-42 | 86.76% | 10 | C:cytoplasm; F:protein binding; P:glycolysis; F:fructose-bisphosphate aldolase activity; P:fructose metabolic process; P:mannose metabolic process; P:inositol metabolic process; P:gluconeogenesis; P:pentose-phosphate shunt; P:carbon utilization | EC:4.1.2.13, |  | GW698059 |
|  | Otpt1_0939_CH0101_065.ab1 | 1 | Glyceraldehyde-3-phosphate dehydrogenase b subunit; chloroplast; pentose phosphate; response to light and sucrose | 695 | 25 | 1.27E-95 | 94.40% | 11 | F:glyceraldehyde-3-phosphate dehydrogenase (phosphorylating) activity; F:NAD binding; P:reductive pentose-phosphate cycle; F:glyceraldehyde-3-phosphate dehydrogenase (NADP+) (phosphorylating) activity; P:oxidation reduction; P:glycolysis; C:chloroplast; P:response to cadmium ion; C:stromule; C:apoplast; P:gluconeogenesis | EC:1.2.1.12, EC:1.2.1.13, |  | GW697906 |
|  | Otpt1_1310_CH0101_022.ab1 | 1 | Malate dehydrogenase; chloroplast; Citrate cycle (TCA cycle) and Glyoxylate and dicarboxylate; Reductive carboxylate cycle (CO2 fixation) and pyruvate metabolism | 496 | 25 | 3.11E-56 | 83.44% | 11 | F:L-malate dehydrogenase activity; F:binding; P:plant-type hypersensitive response; P:response to cold; P:oxidation reduction; P:malate metabolic process; P:glycolysis; C:mitochondrial matrix; P:pyruvate metabolic process; P:reductive tricarboxylic acid cycle; P:glyoxylate metabolic process | EC:1.1.1.37, |  | GW698035 |
|  | Otpt1_1032_CH0101_035.ab1 | 1 | Triosephosphate isomerase; Carbon fixation; fructose and mannose; glucose and gluconeogenesis; inositol | 726 | 25 | 1.50E-81 | 86.20% | 13 | P:reductive pentose-phosphate cycle; F:triose-phosphate isomerase activity; F:protein binding; C:stromule; C:chloroplast; C:thylakoid; C:apoplast; P:fructose metabolic process; P:mannose metabolic process; P:inositol metabolic process; P:gluconeogenesis; P:glycolysis; P:glycerolipid metabolic process | EC:5.3.1.1, |  | GW697938 |
|  | Otpt1_0267_HFY330_066.ab1 | 1 | Triosephosphate isomerase; Carbon fixation; fructose and mannose; glucose and gluconeogenesis; inositol | 680 | 25 | 1.87E-96 | 89.04% | 15 | P:fatty acid biosynthetic process; F:acyltransferase activity; P:pentose-phosphate shunt; F:tetrahydroberberine oxidase activity; F:triose-phosphate isomerase activity; P:glycolysis; P:gluconeogenesis; C:cytoplasm; P:acyl-carrier-protein biosynthetic process; P:alkaloid biosynthetic process; P:fructose metabolic process; P:mannose metabolic process; P:inositol metabolic process; P:carbon utilization; P:glycerolipid metabolic process | EC:1.3.3.8, EC:5.3.1.1, |  | GW697656 |
|  | Otpt1_1004_CH0101_019.ab1 | 1 | Phosphoglycerate kinase cytosolic; Glycolysis and Gluconeogenesis; Carbon fixation | 542 | 25 | 1.22E-76 | 92.96% | 14 | C:cell wall; F:phosphoglycerate kinase activity; C:thylakoid; F:ATP binding; P:glycolysis; C:chloroplast; P:response to cadmium ion; C:nucleus; C:plasma membrane; C:stromule; C:apoplast; P:gluconeogenesis; P:carbon utilization; P:phosphorylation | EC:2.7.2.3, |  | GW697926 |
|  | Otpt1_0888_CH0101_041.ab1 | 1 | Chloroplast fructose-bisphosphatase II | 521 | 25 | 1.29E-53 | 85.68% | 9 | F:fructose-bisphosphatase activity; P:response to cold; C:plastid; P:fructose metabolic process; P:mannose metabolic process; P:gluconeogenesis; P:glycolysis; P:pentose-phosphate shunt; P:carbon utilization |  |  | GW697882 |
|  |  |  | **Other carbohydrate metabolism** |  |  |  |  |  |  |  |  |  |
|  | temperate.fasta.screen.Contig37 | 2 | Glucosyltransferase-like protein; mannane and cellulose synthase | 273 | 25 | 9.16E-29 | 88.24% | 2 | C:membrane; F:transferase activity | - | Otpt1_1192_CH0101_060.ab1; Otpt1_1271_CH0101_031.ab1 | GW698006  GW698032 |
|  | Otpt1_0269_HFY330_093.ab1 | 1 | Basic chitinase; also amino-sugar metabolism (chitin and cell wall catabolism) | 663 | 25 | 3.20E-64 | 87.44% | 3 | F:chitinase activity; P:chitin catabolic process; P:cell wall catabolic process | EC:3.2.1.14, |  | GW697657 |
|  | Otpt1_1517_AM21_038.ab1 | 1 | Beta-amylase; starch and sucrose | 502 | 3 | 3.09E-22 | 62.67% | 2 | P:carbohydrate metabolic process; F:hydrolase activity, acting on glycosyl bonds |  |  | GW698098 |
|  | Otpt1_1087_CH0101_074.ab1 | 1 | Chitinase related; class v; glycosyl hydrolase (chitin and cell wall catabolism) | 476 | 25 | 6.27E-70 | 60.60% | 2 | F:hydrolase activity, hydrolyzing O-glycosyl compounds; P:carbohydrate metabolic process | - |  | GW697955 |
|  | Otpt1_0531_CZ1835_067.ab1 | 1 | Beta 1-3 glucanase | 698 | 25 | 3.02E-36 | 74.92% | 2 | C:cytoplasmic membrane-bounded vesicle; F:catalytic activity | - |  | GW697757 |
|  | temperate.fasta.screen.Contig86 | 3 | Invertase pectin methylesterase inhibitor family protein; carbohydrate cell wall extension | 853 | 25 | 1.02E-32 | 63.32% | 1 | F:pectinesterase inhibitor activity | - | Otpt1_1452_CH0101_086.ab1; Otpt1_1535_AM21_060.ab1; Otpt1_1159_CH0101_048.ab1 | GW698068  GW698106  GW697995 |
|  | Otpt1_0600_CZ1855_017.ab1 | 1 | UDP-galactose 4-epimerase; galactose and nucleotide sugar metabolism; stress response | 427 | 25 | 7.26E-50 | 86.04% | 6 | C:mitochondrion; F:coenzyme binding; F:UDP-glucose 4-epimerase activity; P:galactose metabolic process; P:nucleotide metabolic process; P:nucleotide-sugar metabolic process | EC:5.1.3.2, |  | GW697784 |
|  |  |  |  |  |  |  |  |  |  |  |  |  |
|  | Otpt1_1377_CH0101_048.ab1 | 1 | Xyloglucan endotransglycosylase | 570 | 13 | 1.31E-13 | 75.00% | 5 | F:hydrolase activity, hydrolyzing O-glycosyl compounds; C:apoplast; C:cell wall; P:glucan metabolic process; F:xyloglucan:xyloglucosyl transferase activity | EC:3.2.1, EC:2.4.1.207, |  | GW698043 |
|  |  |  |  |  |  |  |  |  |  |  |  |  |
|  | Otpt1_0364_CZ1835_059.ab1 | 1 | glycosyl hydrolase family protein 17; plasma membrane | 455 | 25 | 6.54E-43 | 79.44% | 1 | C:cytoplasmic membrane-bounded vesicle |  |  | GW697696 |
|  | temperate.fasta.screen.Contig62 | 2 | glycosyl hydrolase family 38 | 288 | 25 | 1.76E-27 | 84.56% | 0 |  | - | Otpt1_0320_CZ1835_027.ab1; Otpt1_0320_AM21_092.ab1 | GW697679  GW698070 |
|  | Otpt1_0401_CZ1835_075.ab1 | 1 | Glycoside hydrolase, family 5; ChaC-like protein | 593 | 25 | 2.32E-64 | 88.80% | 2 | P:response to lead ion; P:response to cadmium ion | - |  | GW697707 |
|  |  |  |  |  |  |  |  |  |  |  |  |  |
|  |  |  | **Nitrogen metabolism – Amino acids** |  |  |  |  |  |  |  |  |  |
|  | *temperate.fasta.screen.Contig24 | 1 | Carbonic anhydrase 1 carbonate dehydratase zinc ion binding | 593 | 25 | 2.35E-24 | 86.28% | 10 | F:protein binding; C:stromule; F:carbonate dehydratase activity; P:carbon utilization; C:chloroplast; C:thylakoid; F:zinc ion binding; C:apoplast; P:one-carbon compound metabolic process; P:nitrogen compound metabolic process | EC:4.2.1.1, | Otpt1_0832_CZ1855_092.ab1 | GW697860 |
|  | *temperate.fasta.screen.Contig42 | 2 | Carbonic anhydrase | 696 | 25 | 2.82E-42 | 84.00% | 10 | F:protein binding; C:stromule; F:carbonate dehydratase activity; P:carbon utilization; C:chloroplast; C:thylakoid; F:zinc ion binding; C:apoplast; P:one-carbon compound metabolic process; P:nitrogen compound metabolic process | EC:4.2.1.1, | Otpt1_0166_HFY330_019.ab1; Otpt1_0536_CZ1835_076.ab1 | GW697622  GW697759 |
|  | Otpt1_1202_CH0101_050.ab1 | 1 | Glutamine synthetase cytosolic; amino acid and Glycan biosynthesis metabolism | 732 | 25 | 5.32E-34 | 96.80% | 5 | C:cytoplasm; F:glutamate-ammonia ligase activity; P:nitrogen fixation; P:glutamine biosynthetic process; P:peptidoglycan biosynthetic process | EC:6.3.1.2, |  | GW698009 |
|  | Otpt1_1079_CH0101_069.ab1 | 1 | NADH-dependent glutamate synthase | 426 | 0 |  |  | 0 |  | - |  | GW697952 |
|  | Otpt1_0159_HFY330_027.ab1 | 1 | Nitrite reductase; NO forming (Nitrite -> Ammonia); sulphite and nitrite assimilation | 665 | 25 | 5.16E-88 | 86.32% | 13 | F:ferredoxin-nitrite reductase activity; F:electron carrier activity; P:nitrate assimilation; F:iron ion binding; F:protein binding; F:heme binding; P:transport; P:oxidation reduction; C:stromule; F:4 iron, 4 sulfur cluster binding; C:chloroplast; C:apoplast; P:electron transport | EC:1.7.7.1, |  | GW697618 |
|  |  |  | **Protein degradation** |  |  |  |  |  |  |  |  |  |
|  | Otpt1_0960_CH0101_085.ab1 | 1 | Gamma glutamyl hydrolase; urea cycle | 641 | 25 | 4.15E-66 | 74.64% | 5 | C:extracellular space; C:vacuole; F:gamma-glutamyl hydrolase activity; C:cell wall; P:folic acid biosynthetic process | - |  | GW697911 |
|  | Otpt1_0011_HFY328_015.ab1 | 1 | Glycine decarboxylase multi-enzyme h subunit; mitochondrion, photorespiration, other amino acid metabolism | 629 | 25 | 2.28E-63 | 90.72% | 10 | P:glycine catabolic process; F:glycine dehydrogenase (decarboxylating) activity; F:aminomethyltransferase activity; F:protein binding; F:lipoic acid binding; C:chloroplast; C:glycine cleavage complex; C:mitochondrion; P:L-serine metabolic process; P:threonine metabolic process | EC:2.1.2.10, |  | GW697564 |
|  | Otpt1_1205_CH0101_075.ab1 | 1 | Glycine decarboxylase; system t protein; aminomethyltransferase; mitochondrion or cytoplasm | 388 | 25 | 1.03E-64 | 93.88% | 7 | P:glycine catabolic process; F:aminomethyltransferase activity; F:transaminase activity; C:glycine cleavage complex; C:mitochondrion; P:L-serine metabolic process; P:threonine metabolic process | EC:2.1.2.10, EC:2.6.1, |  | GW698012 |
|  | Otpt1_0938_CH0101_067.ab1 | 1 | Glycine dehydrogenase, system p-protein; mitochondrion, Glycine serine threonin pathway | 749 | 25 | 1.14E-79 | 71.16% | 10 | F:glycine dehydrogenase (decarboxylating) activity; F:pyridoxal phosphate binding; P:oxidation reduction; C:chloroplast; C:apoplast; C:glycine cleavage complex; P:glycine metabolic process; C:mitochondrion; P:L-serine metabolic process; P:threonine metabolic process | EC:1.4.4.2, |  | GW697905 |
|  | Otpt1_0314_CZ1835_002.ab1 | 1 | Serine carboxypeptidase | 721 | 25 | 1.94E-41 | 78.84% | 5 | F:serine carboxypeptidase activity; C:vacuole; C:cytoplasmic membrane-bounded vesicle; F:carboxypeptidase D activity; P:proteolysis | EC:3.4.16, |  | GW697678 |
|  |  |  |  |  |  |  |  |  |  |  |  |  |
|  |  |  | **Protein folding or modification** |  |  |  |  |  |  |  |  |  |
|  | Otpt1_0071_HFY328_061.ab1 | 1 | Calreticulin 3; chaperone-like; endoplasmic reticulum; Glycan bind calnexin, calcium binding | 646 | 25 | 5.43E-79 | 92.84% | 6 | P:protein folding; C:endomembrane system; C:cytoplasmic membrane-bounded vesicle; F:calcium ion binding; F:unfolded protein binding; C:endoplasmic reticulum |  |  | GW697583 |
|  | Otpt1_1249_CH0101_084.ab1 | 1 | Clathrin assembly protein ap19 homolog; trans-Golgi network | 712 | 25 | 4.45E-83 | 95.52% | 9 | P:vesicle-mediated transport; F:protein transporter activity; C:mitochondrion; C:clathrin coat of trans-Golgi network vesicle; C:plastid; C:clathrin adaptor complex; F:ATP binding; F:protein binding; P:intracellular protein transport |  |  | GW698025 |
|  | temperate.fasta.screen.Contig38 | 2 | Endoplasmic reticulum retrieval protein 1A; Golgi to ER | 644 | 25 | 4.85E-80 | 87.76% | 1 | C:membrane |  | Otpt1_0525_CZ1835_079.ab1; Otpt1_1143_CH0101_030.ab1 | GW697751  GW697986 |
|  | Otpt1_1246_CH0101_090.ab1 | 1 | EXO70 protein B1; protein binding for exocytosis | 561 | 25 | 1.41E-41 | 69.20% | 1 | C:plastid |  |  | GW698023 |
|  | Otpt1_1536_AM21_058.ab1 | 1 | NSF n-ethylmaleimide sensitive factor; s atpases; chaperone-like, assemble protein complexes; ATP-binding | 592 | 25 | 6.19E-25 | 84.52% | 2 | F:ATP binding; F:nucleoside-triphosphatase activity | - |  | GW698107 |
|  | Otpt1_1027_CH0101_045.ab1 | 1 | Peptidyl-prolyl cis-trans isomerase PPIC-type family protein; similar to PIN1AT (parvulin 1At) | 714 | 25 | 4.09E-60 | 83.96% | 2 | F:peptidyl-prolyl cis-trans isomerase activity; P:protein folding | EC:5.2.1.8, |  | GW697933 |
|  | Otpt1_0868_CH0101_017.ab1 | 1 | Ubiquitin-conjugating enzyme | 394 | 25 | 1.69E-54 | 94.00% | 5 | F:ubiquitin-protein ligase activity; P:ubiquitin cycle; P:regulation of protein metabolic process; P:post-translational protein modification; P:protein ubiquitination | - |  | GW697875 |
|  | Otpt1_0287_HFY330_082.ab1 | 1 | ATG8C Autophagy-related ubiquitin-like modifier; with GABA-receptor-associated protein domain | 629 | 25 | 1.38E-52 | 93.28% | 9 | F:protein binding; C:autophagic vacuole; F:APG8-specific protease activity; F:APG8 activating enzyme activity; C:vacuolar lumen; F:APG8 ligase activity; C:mitochondrion; P:autophagy; P:proteolysis |  |  | GW697669 |
|  | Otpt1_1489_AM21_024.ab1 | 1 | Aminopeptidase, unknown function | 622 | 25 | 8.07E-79 | 92.56% | 10 | F:manganese ion binding; F:leucyl aminopeptidase activity; F:prolyl aminopeptidase activity; P:response to stress; F:aminopeptidase activity; C:chloroplast; P:proteolysis; F:zinc ion binding; P:arginine metabolic process; P:proline metabolic process | EC:3.4.11.1, |  | GW698088 |
|  | Otpt1_1211_CH0101_080.ab1 | 1 | Chloroplast nucleoid DNA binding; proteolysis | 718 | 25 | 5.97E-51 | 69.24% | 4 | F:pepsin A activity; P:proteolysis; F:aspartic-type endopeptidase activity; F:DNA binding | EC:3.4.23, |  | GW698015 |
|  |  |  |  |  |  |  |  |  |  |  |  |  |
|  |  |  | **Signaling** |  |  |  |  |  |  |  |  |  |
|  |  |  | **GTPase mediated** |  |  |  |  |  |  |  |  |  |
|  | Otpt1_1532_AM21_064.ab1 | 1 | ADP-ribosylation factor 1; GIP-binding; monomeric G protein | 717 | 25 | 2.26E-66 | 99.80% | 8 | F:GTP binding; C:Golgi apparatus; F:hydrolase activity; P:vesicle-mediated transport; P:intracellular protein transport; P:small GTPase mediated signal transduction; C:mitochondrion; F:transporter activity |  |  | GW698105 |
|  | temperate.fasta.screen.Contig61 | 2 | ADP-ribosylation factor-like protein | 688 | 25 | 4.17E-83 | 93.84% | 3 | C:endomembrane system; C:plasma membrane; C:vacuole |  | Otpt1_1406_CH0101_077.ab1; Otpt1_1471_AM21_004.ab1 | GW698056  GW698080 |
|  | Otpt1_0473_CZ1835_032.ab1 | 1 | GDP dissociation inhibitor; protein transport | 613 | 25 | 1.44E-107 | 94.28% | 3 | F:Rab GDP-dissociation inhibitor activity; P:protein transport; P:regulation of GTPase activity |  |  | GW697730 |
|  | Otpt1_0131_HFY328_086.ab1 | 1 | RAB7 pruarras-related protein; signal transduction, protein transport and regulation of transcription; | 535 | 25 | 1.81E-85 | 98.12% | 9 | C:mitochondrion; P:small GTPase mediated signal transduction; P:regulation of transcription, DNA-dependent; F:ATP binding; F:transcription factor binding; P:protein transport; F:GTP binding; C:plasma membrane; C:transcription factor complex |  |  | GW697605 |
|  |  |  | **Calcium related** |  |  |  |  |  |  |  |  |  |
|  | *Otpt1_1172_CH0101_034.ab1 | 1 | Calmodulin – calcium bound calmodulin isoform 1; Voltage gated cation channel; Phosphatidylinositol signaling system ; response to stimulus | 454 | 25 | 3.74E-14 | 100.00% | 1 | F:calcium ion binding |  |  | GW698000 |
|  |  |  | **Protein modifications – phosphorylation dephosphorylation** |  |  |  |  |  |  |  |  |  |
|  | Otpt1_0817_CZ1855_095.ab1 | 1 | Casein kinase | 486 | 14 | 8.71E-19 | 69.50% | 0 |  | - |  | GW697857 |
|  | Otpt1_0469_CZ1835_021.ab1 | 1 | cysteine proteinase cp2; regulation of autophagy; endomembrane system; | 677 | 25 | 7.04E-88 | 85.64% | 3 | P:response to stress; P:proteolysis; F:cysteine-type endopeptidase activity | EC:3.4.22, |  | GW697728 |
|  | Otpt1_1099_CH0101_083.ab1 | 1 | EYES ABSENT protein; mTOR and ErbB signaling pathways, tyrosine phosphatase, metal dependant | 576 | 25 | 9.58E-52 | 69.12% | 0 |  |  |  | GW697961 |
|  |  |  | **Nucleotides** |  |  |  |  |  |  |  |  |  |
|  | Otpt1_0409_CZ1835_065.ab1 | 1 | Adenosine deaminase; purine biosynthesis | 564 | 25 | 2.35E-68 | 71.40% | 4 | P:nucleotide metabolic process; F:deaminase activity; F:hydrolase activity; P:purine ribonucleoside monophosphate biosynthetic process |  |  | GW697708 |
|  |  |  | **Transport** |  |  |  |  |  |  |  |  |  |
|  |  |  | **Proteins transport** |  |  |  |  |  |  |  |  |  |
|  | Otpt1_0264_HFY330_072.ab1 | 1 | ABC transporter protein 1-like - membrane | 746 | 25 | 2.59E-100 | 84.56% | 2 | F:ATP binding; F:ATPase activity | - |  | GW697653 |
|  | Otpt1_0985_CH0101_016.ab1 | 1 | SEC61 BETA (suppressors of secretion-defective 61 beta); protein transporter | 464 | 25 | 1.31E-14 | 89.60% | 1 | P:protein transport |  |  | GW697920 |
|  | Otpt1_1149_CH0101_018.ab1 | 1 | Developmental protein; protein transport with Snf7 domain | 773 | 25 | 8.34E-81 | 90.56% | 1 | P:protein transport |  |  | GW697989 |
|  | Otpt1_1477_AM21_025.ab1 | 1 | translocase inner mitochondrial membrane protein; subunit 23-2; | 586 | 25 | 2.68E-49 | 74.40% | 1 | C:plastid |  |  | GW698082 |
|  |  |  | **Water transport** |  |  |  |  |  |  |  |  |  |
|  | Otpt1_0807_CZ1855_076.ab1 | 1 | Aquaporin | 221 | 0 |  |  | 0 |  | - |  | GW697853 |
|  | temperate.fasta.screen.Contig97 | 4 | Transmembrane channel protein; aquaporin | 655 | 25 | 2.91E-51 | 98.44% | 4 | P:transport; C:plasma membrane; C:integral to membrane; F:transporter activity |  | Otpt1_0474_CZ1835_030.ab1; Otpt1_1081_CH0101_067.ab1; Otpt1_0922_CH0101_060.ab1; Otpt1_1386_CH0101_063.ab1 | GW697731  GW697953  GW697898  GW698046 |
|  |  |  | **Lipids transport** |  |  |  |  |  |  |  |  |  |
|  | Otpt1_0749_CZ1855_045.ab1 | 1 | Acyl-CoA-binding protein (ACBP1); lipid transport; lead ion binding; mitochondria membrane | 454 | 25 | 1.62E-17 | 89.00% | 2 | F:acyl-CoA binding; P:transport |  |  | GW697836 |
|  | temperate.fasta.screen.Contig18 | 1 | Lipid-transfer protein precursor, facilitate transfer of fatty acid between membranes | 427 | 25 | 6.86E-16 | 81.24% | 2 | F:lipid binding; P:lipid transport |  | Otpt1_0030_HFY328_031.ab1 | GW697569 |
|  | temperate.fasta.screen.Contig31 | 1 | Lipid-transfer protein precursor, facilitate transfer of fatty acid between membranes | 416 |  |  |  |  |  | - | Otpt1_0423_CZ1835_093.ab1 | GW697713 |
|  | temperate.fasta.screen.Contig2 | 1 | Lipid-transfer protein precursor, facilitate transfer of fatty acid between membranes | 411 | 23 | 1.24E-09 | 50.78% | 4 | C:endomembrane system; P:lipid transport; F:lipid binding; P:transport | - | Otpt1_0692_CZ1855_096.ab1 | GW697813 |
|  | temperate.fasta.screen.Contig106 | 4 | Non-specific lipid-transfer protein; endomembrane; lipid transfer; response to abscissic acid | 646 | 25 | 4.81E-35 | 75.40% | 2 | F:lipid binding; P:lipid transport |  | Otpt1_0565_CZ1855_015.ab1; Otpt1_0859_CH0101_004.ab1; Otpt1_0185_HFY330_041.ab1; Otpt1_0973_CH0101_084.ab1 | GW697772  GW697872  GW697631  GW697915 |
|  | *temperate.fasta.screen.Contig102 | 4 | Non-specific lipid-transfer protein; endomembrane; lipid transfer; response to abscissic acid | 623 | 25 | 2.31E-36 | 76.32% | 2 | F:lipid binding; P:lipid transport |  | Otpt1_0498_CZ1835_044.ab1 | GW697738 |
|  |  |  | **Nucleotides transport** |  |  |  |  |  |  |  |  |  |
|  | Otpt1_0882_CH0101_018.ab1 | 1 | ATP:ADP antiporter/ binding (AAC2) adenosine nucleotide translocator protein; mitochondira membrane; purine transport | 409 | 25 | 1.61E-41 | 68.08% | 10 | C:nucleolus; C:vacuole; F:binding; C:mitochondrial inner membrane; C:plasma membrane; C:cell wall; P:transport; C:integral to membrane; C:chloroplast; F:transporter activity |  |  | GW697879 |
|  |  |  |  |  |  |  |  |  |  |  |  |  |
|  |  |  | **Hormone biosysntesis or hormone induced** |  |  |  |  |  |  |  |  |  |
|  | *temperate.fasta.screen.Contig40 | 2 | ABA induced protein; pollen coat protein | 531 | 22 | 1.69E-11 | 67.77% | 3 | C:viral capsid; F:structural molecule activity; P:biological_process | - | Otpt1_0895_CH0101_046.ab1; Otpt1_1029_CH0101_041.ab1 | GW697885  GW697935 |
|  | *temperate.fasta.screen.Contig26 | 1 | ABA induced protein; pollen coat protein | 379 | 24 | 4.60E-12 | 67.96% | 3 | C:viral capsid; F:structural molecule activity; P:biological_process | - | Otpt1_0488_CZ1835_039.ab1 | GW697736 |
|  |  |  |  |  |  |  |  |  |  |  |  |  |
|  | Otpt1_0662_CZ1855_073.ab1 | 1 | Auxin-induced protein 6b | 533 | 25 | 7.07E-34 | 77.44% | 2 | P:auxin mediated signaling pathway; P:response to cold |  |  | GW697801 |
|  | Otpt1_1422_CH0101_072.ab1 | 1 | Auxin-induced protein | 441 | 25 | 2.01E-31 | 78.16% | 0 |  | - |  | GW698115 |
|  | Otpt1_0920_CH0101_062.ab1 | 1 | Auxin-induced protein; for transcription regulation | 501 | 25 | 1.92E-40 | 71.60% | 2 | P:regulation of transcription; F:protein binding |  |  | GW697897 |
|  | *Otpt1_1075_CH0101_075.ab1 | 1 | Auxin associated family protein; dormancy; unknown function | 630 | 25 | 2.74E-40 | 76.40% | 1 | P:auxin mediated signaling pathway | - |  | GW697951 |
|  | Otpt1_1248_CH0101_086.ab1 | 1 | Aminopeptidase like protein; auxin polar transport | 377 | 17 | 3.19E-21 | 73.76% | 0 |  |  |  | GW698024 |
|  | Otpt1_0279_HFY330_094.ab1 | 1 | Brassinosteroid biosynthetic protein, for unidimensional dell growth | 713 | 25 | 8.60E-111 | 91.12% | 3 | F:oxidoreductase activity; C:plasma membrane; F:FAD binding |  |  | GW697665 |
|  | Otpt1_0894_CH0101_048.ab1 | 1 | ACC oxydase; aminocyclopropane-1-carboxylate oxidase; ethylene response | 711 | 25 | 2.51E-102 | 94.32% | 6 | P:ethylene biosynthetic process; P:ripening; F:L-ascorbic acid binding; F:iron ion binding; F:1-aminocyclopropane-1-carboxylate oxidase activity; P:oxidation reduction | EC:1.14.17.4, |  | GW697884 |
|  | Otpt1_1483_AM21_032.ab1 | 1 | Gibberellin regulated protein; gast-like gene product; for unidimensional dell growth; also regulated by brassinosteroid and abscissic acid | 593 | 25 | 4.58E-28 | 82.24% | 0 |  |  |  | GW698085 |
|  | Otpt1_1148_CH0101_020.ab1 | 1 | Gibberellin regulated protein; anti-microbial peptide, involved plant development | 508 | 25 | 4.10E-30 | 84.12% | 1 | P:response to gibberellin stimulus | - |  | GW697988 |
|  | temperate.fasta.screen.Contig60 | 2 | Gibberellin regulated protein; gip1-like protein | 665 | 25 | 7.04E-53 | 77.20% | 0 |  | - | Otpt1_1405_CH0101_079.ab1; Otpt1_1497_AM21_045.ab1 | GW698055  GW698091 |
|  | temperate.fasta.screen.Contig13 | 1 | Gibberellin regulated protein; gip1-like protein | 656 | 25 | 3.67E-54 | 77.88% | 0 |  | - | Otpt1_0579_CZ1855_008.ab1 | GW697777 |
|  | temperate.fasta.screen.Contig50 | 2 | Indole-3-acetic acid induced protein ARG-2 homolog; unknown function; response to stress | 648 | 25 | 1.47E-23 | 61.36% | 1 | P:response to stress |  | Otpt1_0217_HFY330_053.ab1; Otpt1_0685_CZ1855_087.ab1 | GW697641  GW697810 |
|  | Otpt1_0618_CZ1855_033.ab1 | 1 | Lipoxygenase-3 LOX3, jasmonic acid and abscissic acid response, electron transport | 562 | 25 | 6.37E-26 | 81.08% | 7 | C:cytoplasm; P:oxylipin biosynthetic process; F:electron carrier activity; F:iron ion binding; P:oxidation reduction; F:lipoxygenase activity; P:electron transport | EC:1.13.11.12, |  | GW697791 |
|  | temperate.fasta.screen.Contig79 | 3 | Jasmonate induced protein | 885 | 20 | 1.18E-71 | 60.75% | 1 | C:mitochondrion |  | Otpt1_0876_CH0101_028.ab1; Otpt1_0879_CH0101_022.ab1; Otpt1_0771_CZ1855_063.ab1 | GW697877  GW697878  GW697842 |
|  |  |  | **Secondary metabolite** |  |  |  |  |  |  |  |  |  |
|  | Otpt1_0701_CZ1855_084.ab1 | 1 | Dihydroflavonol reductase; Flavonoid and lignin biosynthesis, secondary metabolite | 701 | 25 | 5.68E-75 | 75.76% | 6 | F:cinnamoyl-CoA reductase activity; P:lignin biosynthetic process; F:coenzyme binding; C:plastid; P:coumarin biosynthetic process; P:stilbene biosynthetic process |  |  | GW697819 |
|  | Otpt1_0428_CZ1835_087.ab1 |  | ENT-kaurenoic acid oxidase; diterpenoid biosynthesis, requires cytochrome P450 | 674 | 25 | 1.33E-38 | 68.40% | 2 | F:binding; C:cell part |  |  | GW697715 |
|  | Otpt1_0980_CH0101_007.ab1 | 1 | Isoflavone reductase-like NADH-dependent oxidoreductase; negative regulation of transcription; regulation of nitrogen utilization; response to cadmium ions | 675 | 25 | 2.37E-51 | 88.72% | 8 | P:regulation of nitrogen utilization; C:cytoplasm; P:oxidation reduction; F:oxidoreductase activity; F:binding; F:transcription repressor activity; P:negative regulation of transcription; C:transcriptional repressor complex |  |  | GW697918 |
|  | Otpt1_0133_HFY328_082.ab1 | 1 | Oxidoreductase, 2OG-Fe(II) oxygenase family protein; leucoanthocyanidin dioxygenase | 481 | 25 | 2.32E-32 | 85.16% | 2 | F:oxidoreductase activity; F:iron ion binding | EC:1.21.3.1, |  | GW697607 |
|  | Otpt1_0271_HFY330_089.ab1 | 1 | SRG1 (senescence-related gene 1); oxidoreductase, a 2og-Fe(II) oxygenase, flavonoid biosynthetis, | 682 | 25 | 7.33E-24 | 87.36% | 2 | P:flavonoid biosynthetic process; F:oxidoreductase activity, acting on paired donors, with incorporation or reduction of molecular oxygen, 2-oxoglutarate as one donor, and incorporation of one atom each of oxygen into both donors | - |  | GW697659 |
|  | Otpt1_0720_CZ1855_006.ab1 | 1 | Oxydoreductase; stilbene and flavonoid metabolism | 588 | 25 | 2.63E-44 | 71.68% | 2 | P:flavonoid biosynthetic process; F:oxidoreductase activity, acting on paired donors, with incorporation or reduction of molecular oxygen, 2-oxoglutarate as one donor, and incorporation of one atom each of oxygen into both donors | - |  | GW697827 |
|  | Otpt1_0413_CZ1835_078.ab1 | 1 | Oxydoreductase; stilbene and flavonoid metabolism | 546 | 25 | 5.55E-48 | 68.64% | 2 | P:flavonoid biosynthetic process; F:oxidoreductase activity, acting on paired donors, with incorporation or reduction of molecular oxygen, 2-oxoglutarate as one donor, and incorporation of one atom each of oxygen into both donors | - |  | GW697709 |
|  | Otpt1_1478_AM21_023.ab1 | 1 | Senescence-related gene 1 (srg1); incorporation or reduction of molecular 2-oxoglutarate; stilbene and flavonoid metabolism | 657 | 25 | 1.56E-72 | 74.24% | 2 | P:flavonoid biosynthetic process; F:oxidoreductase activity, acting on paired donors, with incorporation or reduction of molecular oxygen, 2-oxoglutarate as one donor, and incorporation of one atom each of oxygen into both donors |  |  | GW698083 |
|  |  |  | **Response to biotic or abiotic stimulus** |  |  |  |  |  |  |  |  |  |
|  | temperate.fasta.screen.Contig91 | 3 | ADR6 aluminum induced; embryonic abundant protein precursor-like protein; with BURP domain | 741 | 25 | 3.13E-106 | 58.44% | 0 |  | - | Otpt1_0753_CZ1855_041.ab1; Otpt1_1010_CH0101_030.ab1; Otpt1_0526_CZ1835_077.ab1 | GW697837  GW697927  GW697752 |
|  | temperate.fasta.screen.Contig95 | 3 | ADR6 aluminum induced; embryonic abundant protein precursor-like protein; with BURP domain | 712 | 25 | 6.86E-84 | 57.40% | 0 |  | - | Otpt1_0182_HFY330_047.ab1; Otpt1_1028_CH0101_043.ab1; Otpt1_1441_CH0101_083.ab1 | GW697628  GW697934  GW698063 |
|  | temperate.fasta.screen.Contig52 | 2 | ADR6 aluminum induced; embryonic abundant protein precursor-like protein; with BURP domain | 712 | 25 | 5.07E-87 | 56.20% | 0 |  | - | Otpt1_1544_AM21_077.ab1; Otpt1_0563_CZ1835_084.ab1 | GW698110  GW697771 |
|  | *Otpt1_0708_CZ1855_005.ab1 | 1 | AVR99 cf-9 rapidly elicited protein 20; calcium binding | 527 | 25 | 5.74E-41 | 81.32% | 3 | P:protein folding; C:cytosol; F:calcium ion binding |  |  | GW697825 |
|  | temperate.fasta.screen.Contig111 | 5 | Cold-induced PsAD2-like protein | 664 | 3 | 8.11E-25 | 70.33% | 0 |  | - | Otpt1_0837_CZ1855_084.ab1; Otpt1_1206_CH0101_073.ab1; Otpt1_0604_CZ1855_026.ab1; Otpt1_0941_CH0101_080.ab1; Otpt1_0679_CZ1855_091.ab1 | GW697862  GW698013  GW697786  GW697907  GW697808 |
|  | temperate.fasta.screen.Contig22 | 1 | Cold-induced PsAD2-like protein | 522 | 2 | 1.25E-19 | 72.00% | 0 |  | - | Otpt1_1194_CH0101_058.ab1 | GW698007 |
|  | temperate.fasta.screen.Contig3 | 1 | Cold induced PsAD2-like | 476 | 3 | 4.26E-26 | 66.67% | 0 |  | - | Otpt1_1262_CH0101_014.ab1 | GW698030 |
|  | Otpt1_0137_HFY330_009.ab1 | 1 | Senescence-associated protein; cold regulated | 535 | 10 | 3.44E-52 | 84.70% | 0 |  | - |  | GW697609 |
|  | Otpt1_0864_CH0101_025.ab1 | 1 | Dehydrin, very weak similarity to ERD10 and ERD14 COR protein | 635 | 1 | 9.96E-06 | 88.00% | 2 | P:response to water; P:response to stress |  |  | GW697874 |
|  | Otpt1_0238_HFY330_052.ab1 | 1 | Drought-stress protein | 463 | 0 |  |  | 0 |  | - |  | GW697646 |
|  | *temperate.fasta.screen.Contig64 | 2 | Germin-like protein; Mn ion binding, nutrient reservoir | 469 | 25 | 3.29E-26 | 78.00% | 7 | F:nutrient reservoir activity; F:manganese ion binding; C:cytoplasmic membrane-bounded vesicle; F:superoxide dismutase activity; P:oxidation reduction; C:apoplast; P:superoxide metabolic process |  | Otpt1_0337_CZ1835_018.ab1; Otpt1_0434_CZ1835_092.ab1 | GW697688  GW697719 |
|  | *Otpt1_1500_AM21_039.ab1 | 1 | Germin-like protein; Mn ion binding, nutrient reservoir | 394 | 25 | 3.42E-47 | 78.12% | 2 | C:extracellular region; F:manganese ion binding |  |  | GW698093 |
|  | temperate.fasta.screen.Contig87 | 3 | Heat- and acid-stable phosphoprotein 28 kda (HASP) | 765 | 25 | 6.14E-44 | 78.56% | 2 | C:mitochondrion; P:cell proliferation |  | Otpt1_1123_CH0101_012.ab1; Otpt1_1203_CH0101_079.ab1; Otpt1_0592_CZ1855_029.ab1 | GW697975  GW698010  GW697779 |
|  | Otpt1_0896_CH0101_044.ab1 | 1 | Heat shock protein 90; ATP binding | 559 | 25 | 4.00E-81 | 97.44% | 6 | P:protein folding; F:unfolded protein binding; C:cytoplasm; F:ATP binding; P:response to stress; C:plasma membrane | - |  | GW697886 |
|  | Otpt1_0549_CZ1835_087.ab1 | 1 | Heat-shock protein; endomembrane system | 559 | 9 | 3.00E-16 | 77.89% | 0 |  | - |  | GW697768 |
|  | Otpt1_0080_HFY328_062.ab1 | 1 | Heat shock protein DnaJ | 705 | 12 | 2.00E-11 | 74.08% | 1 | F:heat shock protein binding | - |  | GW697589 |
|  | Otpt1_0548_CZ1835_089.ab1 | 1 | Light-inducible protein ATLS1; macrophage migration inhibitory factor family protein (MIF); response to other organisms | 674 | 25 | 5.57E-53 | 91.48% | 3 | P:inflammatory response; C:membrane; P:response to other organism |  |  | GW697767 |
|  | *Otpt1_0104_HFY328_072.ab1 | 1 | Pathogenesis related PR10-1 protein | 708 | 25 | 1.21E-56 | 80.88% | 3 | P:defense response; P:response to biotic stimulus; C:cytoplasm |  |  | GW697596 |
|  | *temperate.fasta.screen.Contig54 | 2 | Pathogenesis related protein; ABR18 | 721 | 25 | 1.75E-66 | 84.32% | 3 | P:defense response; P:response to biotic stimulus; C:cytoplasm |  | Otpt1_1367_CH0101_041.ab1; Otpt1_0569_CZ1855_009.ab1 | GW698039  GW697775 |
|  | Otpt1_1212_CH0101_078.ab1 | 1 | Pathogen related | 504 | 2 | 4.42E-16 | 61.50% | 0 |  | - |  | GW698016 |
|  | temperate.fasta.screen.Contig34 | 1 | Pathogen related | 747 | 25 | 2.21E-99 | 73.52% | 2 | P:response to biotic stimulus; P:defense response | - | Otpt1_0519_CZ1835_058.ab1 | GW697749 |
|  | temperate.fasta.screen.Contig6 | 1 | Pathogen related | 700 | 25 | 3.42E-96 | 75.72% | 2 | P:response to biotic stimulus; P:defense response | - | Otpt1_0669_CZ1855_080.ab1 | GW697804 |
|  | temperate.fasta.screen.Contig101 | 4 | Ripening related protein; bet v 1; major latex-like protein | 743 | 25 | 2.76E-78 | 66.08% | 3 | P:defense response; P:response to biotic stimulus; C:chloroplast |  | Otpt1_1473_AM21_031.ab1; Otpt1_1042_CH0101_038.ab1; Otpt1_1380_CH0101_042.ab1; Otpt1_0634_CZ1855_061.ab1 | GW698081  GW697941  GW698045  GW697795 |
|  | temperate.fasta.screen.Contig81 | 3 | Ripening related protein; bet v 1; major latex-like protein | 734 | 25 | 7.32E-84 | 67.12% | 3 | P:defense response; P:response to biotic stimulus; C:chloroplast |  | Otpt1_1465_AM21_014.ab1; Otpt1_0017_HFY328_005.ab1; Otpt1_1169_CH0101_036.ab1 | GW698077  GW697566  GW697999 |
|  | temperate.fasta.screen.Contig93 | 3 | Ripening related protein; bet v 1; major latex-like protein | 717 | 25 | 1.41E-76 | 65.00% | 3 | P:defense response; P:response to biotic stimulus; C:chloroplast |  | Otpt1_0323_CZ1835_021.ab1; Otpt1_0468_CZ1835_023.ab1; Otpt1_1254_CH0101_009.ab1 | GW697681  GW697727  GW698027 |
|  | temperate.fasta.screen.Contig48 | 2 | Ripening related protein; bet v 1 | 642 | 25 | 1.57E-62 | 64.32% | 2 | P:response to biotic stimulus; P:defense response |  | Otpt1_1368_CH0101_039.ab1; Otpt1_0193_HFY330_048.ab1 | GW698040  GW697633 |
|  | temperate.fasta.screen.Contig32 | 1 | Ripening related protein; bet v 1 | 679 | 25 | 5.37E-83 | 66.84% | 3 | P:defense response; P:response to biotic stimulus; C:chloroplast |  | Otpt1_0502_CZ1835_036.ab1 | GW697741 |
|  | temperate.fasta.screen.Contig17 | 1 | Ripening related protein; bet v 1; major latex-like protein | 651 | 25 | 1.09E-70 | 65.68% | 3 | P:defense response; P:response to biotic stimulus; C:chloroplast |  | Otpt1_0534_CZ1835_080.ab1 | GW697758 |
|  | temperate.fasta.screen.Contig8 | 1 | Ripening related protein; bet v 1; major latex-like protein | 610 | 25 | 4.15E-83 | 66.60% | 3 | P:defense response; P:response to biotic stimulus; C:chloroplast |  | Otpt1_0566_CZ1855_013.ab1 | GW697773 |
|  | Otpt1_1511_AM21_044.ab1 | 1 | Wound-response protein | 524 | 6 | 5.08E-13 | 60.50% | 1 | P:biological_process | - |  | GW698096 |
|  | temperate.fasta.screen.Contig80 | 3 | Vegetative storage protein; acid phosphatase | 703 | 25 | 4.77E-73 | 70.92% | 3 | F:acid phosphatase activity; P:riboflavin metabolic process; P:hexachlorocyclohexane metabolic process | EC:3.1.3.2, | Otpt1_1068_CH0101_058.ab1; Otpt1_0872_CH0101_030.ab1; Otpt1_0353_CZ1835_044.ab1 | GW697947  GW697876  GW697691 |
|  | Otpt1_0031_HFY328_029.ab1 | 1 | Vegetative storage protein; acid phosphatase | 709 | 25 | 4.70E-85 | 63.00% | 1 | C:cellulose and pectin-containing cell wall | EC:3.1.3.2, |  | GW697570 |
|  | Otpt1_1461_AM21_005.ab1 | 1 | Vegetative storage protein; acid phosphatase | 636 | 25 | 8.65E-74 | 64.12% | 3 | C:cellulose and pectin-containing cell wall; C:cytoplasmic part; C:intracellular membrane-bounded organelle | EC:3.1.3.2, |  | GW698073 |
|  | Otpt1_0672_CZ1855_074.ab1 | 1 | Tetratricopeptide repeat-containing protein; | 185 | 25 | 3.35E-18 | 72.68% | 4 | F:molecular_function; F:binding; P:biological_process; C:cellular_component |  |  | - |
|  | Otpt1_0851_CH0101_001.ab1 | 1 | Trypsin protein inhibitor 2; defense response | 656 | 25 | 9.97E-60 | 62.00% | 2 | C:extracellular region; F:serine-type endopeptidase inhibitor activity |  |  | GW697866 |
|  | *Otpt1_0075_HFY328_053.ab1 | 1 | Trypsin protein inhibitor 3 | 702 | 25 | 7.62E-80 | 53.32% | 2 | F:peptidase activity; F:endopeptidase inhibitor activity |  |  | GW697587 |
|  |  |  |  |  |  |  |  |  |  |  |  |  |
|  |  |  | **Lipids** |  |  |  |  |  |  |  |  |  |
|  | Otpt1_0382_CZ1835_056.ab1 | 1 | GDSL-motif lipase/hydrolase family protein, carboxylesterase; endomembrane | 559 | 25 | 1.43E-46 | 72.04% | 2 | F:lipase activity; P:lipid catabolic process | EC:3.1.1, EC:3.1.1.1, |  | GW697701 |
|  | Otpt1_0100_HFY328_080.ab1 | 1 | GDSL-motif lipase/hydrolase family protein, carboxylesterase; endomembrane | 641 | 25 | 2.25E-37 | 72.36% | 0 |  | - |  | GW697595 |
|  |  |  |  |  |  |  |  |  |  |  |  |  |
|  | Otpt1_1138_CH0101_023.ab1 | 1 | ATLIP1; lysosomal acid lipase; galactolipase/ hydrolase/ phospholipase/ triacylglycerol lipase | 437 | 25 | 7.22E-26 | 70.08% | 0 |  |  |  | GW697982 |
|  | temperate.fasta.screen.Contig70 | 2 | SEC14 cytosolic factor family protein; phosphoglyceride transfer family protein | 525 | 25 | 1.32E-24 | 73.40% | 3 | C:plastid; P:transport; F:transporter activity |  | Otpt1_0397_CZ1835_079.ab1; Otpt1_0504_CZ1835_063.ab1 | GW697705  GW697743 |
|  | Otpt1_0056_HFY328_037.ab1 | 1 | lipid transfer protein family protein; LTP; protease inhibitor; seed storage | 455 | 25 | 4.69E-41 | 82.32% | 2 | P:lipid transport; C:cytoplasmic membrane-bounded vesicle | - |  | GW697577 |
|  |  |  | **Pyruvate - fatty acids** |  |  |  |  |  |  |  |  |  |
|  | *temperate.fasta.screen.Contig41 | 2 | accD acetyl CoA carboxylase beta subunit | 521 | 25 | 4.41E-86 | 91.36% | 7 | C:acetyl-CoA carboxylase complex; P:fatty acid biosynthetic process; F:transferase activity; C:chloroplast; F:zinc ion binding; F:acetyl-CoA carboxylase activity; P:pyruvate metabolic process | EC:6.4.1.2, | Otpt1_0160_HFY330_025.ab1; Otpt1_0483_CZ1835_018.ab1 | GW697619  GW697735 |
|  |  |  |  |  |  |  |  |  |  |  |  |  |
|  |  |  | **Ribosomes and translation** |  |  |  |  |  |  |  |  |  |
|  |  |  | **Ribosome biogenesis and assembly - organelles** |  |  |  |  |  |  |  |  |  |
|  | Otpt1_0961_CH0101_083.ab1 | 1 | 50s ribosomal protein L12 chloroplast precursor | 691 | 25 | 2.96E-36 | 80.68% | 9 | C:ribosome; F:structural constituent of ribosome; F:RNA binding; C:stromule; C:nucleoid; C:chloroplast; C:thylakoid; P:translation; P:ribosome biogenesis and assembly | EC:3.6.5.3, |  | GW697912 |
|  | *Otpt1_1376_CH0101_033.ab1 | 1 | 23S ribosomal RNA; orf9; chloroplast genome | 488 | 25 | 3.75E-46 | 76.00% | 1 | C:chloroplast |  |  | GW698042 |
|  |  |  | **Ribosome biogenesis and assembly - cell** |  |  |  |  |  |  |  |  |  |
|  | Otpt1_1141_CH0101_017.ab1 | 1 | 40s ribosomal protein s11 | 682 | 25 | 2.40E-75 | 95.68% | 6 | F:structural constituent of ribosome; C:cell wall; C:cytosolic small ribosomal subunit; P:translation; F:rRNA binding; P:ribosome biogenesis and assembly | EC:3.6.5.3, |  | GW697984 |
|  | Otpt1_0706_CZ1855_009.ab1 | 1 | 40S ribosomal protein s13 | 716 | 25 | 5.68E-78 | 96.04% | 4 | F:structural constituent of ribosome; C:cytosolic small ribosomal subunit; P:translation; P:ribosome biogenesis and assembly | EC:3.6.5.3, |  | GW697823 |
|  | Otpt1_1072_CH0101_050.ab1 | 1 | 40S ribosomal protein s3a | 698 | 25 | 9.25E-86 | 94.84% | 4 | C:ribosome; F:structural constituent of ribosome; P:translation; P:ribosome biogenesis and assembly | EC:3.6.5.3, |  | GW697950 |
|  | Otpt1_0610_CZ1855_018.ab1 | 1 | 40S ribosomal protein s3a | 642 | 25 | 1.04E-82 | 94.84% | 4 | F:structural constituent of ribosome; C:cytosolic small ribosomal subunit; P:translation; P:ribosome biogenesis and assembly | EC:3.6.5.3, |  | GW697788 |
|  | Otpt1_0123_HFY328_096.ab1 | 1 | 40S ribosomal protein s6 | 595 | 25 | 1.79E-96 | 96.48% | 6 | C:nucleolus; C:cytosolic ribosome; F:structural constituent of ribosome; C:plasma membrane; P:translation; P:ribosome biogenesis and assembly | EC:3.6.5.3, |  | GW697602 |
|  | temperate.fasta.screen.Contig23 | 1 | 40s ribosomal protein s10-like | 724 | 25 | 2.56E-49 | 89.28% | 2 | C:cytosolic small ribosomal subunit; P:translation | EC:3.6.5.3, | Otpt1_0834_CZ1855_090.ab1 | GW697861 |
|  | Otpt1_0033_HFY328_025.ab1 | 1 | 40s ribosomal protein s15a | 631 | 25 | 3.11E-68 | 98.32% | 6 | F:structural constituent of ribosome; C:plasma membrane; C:cell wall; C:cytosolic small ribosomal subunit; P:translation; P:ribosome biogenesis and assembly | EC:3.6.5.3, |  | GW697571 |
|  | Otpt1_1398_CH0101_060.ab1 | 1 | 40s ribosomal protein s9 | 717 | 25 | 2.83E-93 | 95.92% | 5 | F:structural constituent of ribosome; C:cytosolic small ribosomal subunit; P:translation; F:rRNA binding; P:ribosome biogenesis and assembly | EC:3.6.5.3, |  | GW698051 |
|  | *Otpt1_0221_HFY330_051.ab1 | 1 | 40s ribosomal protein s23 | 636 | 25 | 2.06E-75 | 97.04% | 5 | F:structural constituent of ribosome; C:cytosolic small ribosomal subunit; P:translation; C:mitochondrion; P:ribosome biogenesis and assembly | EC:3.6.5.3, |  | GW697642 |
|  | Otpt1_0388_CZ1835_054.ab1 | 1 | 60S ribosomal protein l1 | 647 | 25 | 7.77E-110 | 92.32% | 4 | F:structural constituent of ribosome; C:cytosolic large ribosomal subunit; P:translation; P:ribosome biogenesis and assembly | - |  | GW697702 |
|  | Otpt1_0897_CH0101_042.ab1 | 1 | 60S ribosomal protein l10a | 735 | 25 | 8.68E-101 | 94.48% | 6 | F:structural constituent of ribosome; P:post-embryonic organ development; P:adaxial/abaxial pattern formation; C:cytosolic large ribosomal subunit; P:translation; P:ribosome biogenesis and assembly | - |  | GW697887 |
|  | temperate.fasta.screen.Contig107 | 4 | 60S ribosomal protein l11 or RPL16 | 706 | 25 | 5.70E-83 | 97.32% | 5 | F:structural constituent of ribosome; C:cytosolic large ribosomal subunit; P:translation; F:rRNA binding; P:ribosome biogenesis and assembly | EC:3.6.5.3, | Otpt1_0552_CZ1835_085.ab1; Otpt1_1409_CH0101_075.ab1; Otpt1_0721_CZ1855_004.ab1; Otpt1_0366_CZ1835_055.ab1 | GW697769  GW698057  GW697828  GW697698 |
|  | Otpt1_0628_CZ1855_040.ab1 | 1 | 60S ribosomal protein l13 or bbc1 protein | 632 | 25 | 2.21E-98 | 93.60% | 6 | C:cytosolic ribosome; F:structural constituent of ribosome; C:plasma membrane; C:cell wall; P:translation; P:ribosome biogenesis and assembly | EC:3.6.5.3, |  | GW697793 |
|  | temperate.fasta.screen.Contig59 | 2 | 60S ribosomal protein l14 or glycoprotein-like ribosomal | 591 | 25 | 3.04E-56 | 93.20% | 5 | F:structural constituent of ribosome; P:ribosome biogenesis and assembly; C:cytosolic large ribosomal subunit; P:translation; C:endoplasmic reticulum | - | Otpt1_0343_CZ1835_039.ab1; Otpt1_0280_HFY330_092.ab1 | GW697689  GW697666 |
|  | Otpt1_1360_CH0101_047.ab1 | 1 | 60S ribosomal protein l17 domain; L14p/L23e; wound inducible | 575 | 25 | 3.81E-69 | 97.56% | 5 | F:structural constituent of ribosome; C:cytosolic large ribosomal subunit; P:translation; C:mitochondrion; P:ribosome biogenesis and assembly | EC:3.6.5.3, |  | GW698037 |
|  | Otpt1_0266_HFY330_068.ab1 | 1 | 60S ribosomal protein l18 | 346 | 25 | 1.39E-24 | 97.20% | 6 | C:vacuole; F:structural constituent of ribosome; C:plasma membrane; C:cytosolic large ribosomal subunit; P:translation; P:ribosome biogenesis and assembly | EC:3.6.5.3, |  | GW697655 |
|  | Otpt1_0132_HFY328_084.ab1 | 1 | 60S ribosomal protein l27 homolog | 526 | 25 | 4.42E-34 | 88.48% | 5 | F:structural constituent of ribosome; P:ribosome biogenesis and assembly; C:cytosolic large ribosomal subunit; P:translation; C:mitochondrion | EC:3.6.5.3, |  | GW697606 |
|  | Otpt1_0183_HFY330_045.ab1 | 1 | 60S ribosomal protein l30 | 573 | 25 | 1.96E-57 | 94.40% | 4 | F:structural constituent of ribosome; C:cytosolic large ribosomal subunit; P:translation; P:ribosome biogenesis and assembly | EC:3.6.5.3, |  | GW697629 |
|  | Otpt1_0363_CZ1835_061.ab1 | 1 | 60S ribosomal protein L35a | 591 | 25 | 1.91E-58 | 94.80% | 4 | F:structural constituent of ribosome; P:ribosome biogenesis and assembly; C:cytosolic large ribosomal subunit; P:translation | EC:3.6.5.3, |  | GW697695 |
|  | Otpt1_0454_CZ1835_016.ab1 | 1 | 60S ribosomal protein l38 | 469 | 25 | 1.29E-30 | 96.44% | 4 | F:structural constituent of ribosome; P:ribosome biogenesis and assembly; C:cytosolic large ribosomal subunit; P:translation | EC:3.6.5.3, |  | GW697722 |
|  | Otpt1_1134_CH0101_025.ab1 | 1 | 60S ribosomal protein l7-like protein | 779 | 25 | 1.31E-73 | 69.48% | 4 | F:structural constituent of ribosome; C:cytosolic large ribosomal subunit; P:translation; P:ribosome biogenesis and assembly | - |  | GW697981 |
|  | Otpt1_0730_CZ1855_025.ab1 | 1 | ubiquitin extension protein; ribosomal; S27A; response to dehydration | 623 | 25 | 5.10E-68 | 98.40% | 5 | C:ribosome; P:protein modification process; F:structural constituent of ribosome; P:translation; P:ribosome biogenesis and assembly | EC:3.6.5.3, |  | GW697829 |
|  | Otpt1_1288_CH0101_032.ab1 | 1 | ubiquitin fusion protein; fused to ribosomal protein L40 | 541 | 25 | 5.68E-66 | 95.56% | 6 | P:protein modification process; F:structural constituent of ribosome; C:cytosolic large ribosomal subunit; C:nucleus; P:translational elongation; P:ribosome biogenesis and assembly | EC:3.6.5.3, |  | GW698033 |
|  | Otpt1_1139_CH0101_021.ab1 | 1 | ubiquitin fusion protein | 648 | 25 | 1.07E-66 | 97.36% | 5 | P:protein modification process; F:structural constituent of ribosome; C:cytosolic large ribosomal subunit; P:translational elongation; P:ribosome biogenesis and assembly | EC:3.6.5.3, |  | GW697983 |
|  |  |  | **Other translation proteins** |  |  |  |  |  |  |  |  |  |
|  | Otpt1_0933_CH0101_075.ab1 | 1 | Eukaryotic translation initiation factor 4e | 356 | 25 | 8.09E-17 | 94.52% | 4 | F:RNA binding; F:translation initiation factor activity; C:ribosome; P:regulation of translational initiation |  |  | GW697902 |
|  | Otpt1_1488_AM21_026.ab1 | 1 | Translation release factor | 477 | 25 | 1.39E-69 | 81.60% | 5 | F:translation release factor activity; C:ribosome; ; P:regulation of translational termination; C:translation release factor complex |  |  | GW698087 |
|  | Otpt1_0528_CZ1835_073.ab1 | 1 | Elongation factor Tu; chloroplast precursor | 440 | 25 | 1.50E-23 | 94.00% | 6 | F:translation elongation factor activity; F:GTP binding; C:chloroplast; F:GTPase activity; C:ribosome; P:regulation of translational elongation | EC:3.6.5.1, EC:3.6.5.2, EC:3.6.5.3, EC:3.6.5.4, |  | GW697754 |
|  | Otpt1_0496_CZ1835_048.ab1 | 1 | EMBRYO DEFECTIVE 1129; structural constituent of ribosome | 553 | 0 |  |  | 0 |  | - |  | GW697737 |
|  |  |  | **RNA associated proteins** |  |  |  |  |  |  |  |  |  |
|  | Otpt1_1030_CH0101_039.ab1 | 1 | RNA recognition motif-containing protein; similar to DEAD-box helicase | 720 | 25 | 5.29E-39 | 77.20% | 1 | C:mitochondrion |  |  | GW697936 |
|  | Otpt01_0002_CZ1321_041.ab1 | 1 | RNA-binding protein; chloroplast; polyU binding | 689 | 25 | 2.23E-52 | 69.28% | 5 | P:innate immune response; P:response to cold; C:stromule; F:poly(U) binding; C:chloroplast |  |  | GW698111 |
|  | Otpt1_0815_CZ1855_066.ab1 | 1 | RAS-gtpase-activating protein sh3-domain binding protein; RRM domain for RNA binding; traffic between cytoplasm and nucleus | 552 | 25 | 1.24E-50 | 61.96% | 1 | P:nucleocytoplasmic transport | - |  | GW697856 |
|  | Otpt1_1481_AM21_019.ab1 | 1 | RNA-binding s4 domain-containing protein | 745 | 25 | 5.43E-82 | 85.44% | 3 | C:mitochondrion; F:rRNA binding; C:cytosolic small ribosomal subunit | - |  | GW698084 |
|  | Otpt1_0121_HFY328_083.ab1 | 1 | RNS2 (ribonuclease 2) endoribonuclease; intracellular space | 628 | 25 | 3.05E-92 | 71.60% | 4 | C:cytoplasmic membrane-bounded vesicle; F:RNA binding; F:endoribonuclease activity; P:regulation of RNA metabolic process |  |  | GW697601 |
|  | Otpt1_0245_HFY330_075.ab1 | 1 | Small nucleolar ribonucleotide complex ; nucleus | 648 | 25 | 6.33E-51 | 96.84% | 1 | C:small nucleolar ribonucleoprotein complex |  |  | GW697648 |
|  | Otpt1_1151_CH0101_045.ab1 | 1 | Small nucleolar ribonucleoprotein F; nucleus | 665 | 25 | 2.97E-35 | 95.44% | 1 | C:nucleolus | - |  | GW697990 |
|  | Otpt1_0529_CZ1835_071.ab1 | 1 | Small nucleolar ribonucleotide complex F; nucleus | 625 | 25 | 8.90E-36 | 85.72% | 7 | C:nucleolus; P:RNA splicing; C:spliceosome; F:RNA binding; F:protein binding; C:small nuclear ribonucleoprotein complex; P:mRNA processing |  |  | GW697990 |
|  |  |  | **DNA associated proteins** |  |  |  |  |  |  |  |  |  |
|  | Otpt1_1160_CH0101_046.ab1 | 1 | Sister-chromatid cohesion protein; cell division and chromosome partitioning | 698 | 12 | 5.34E-25 | 70.58% | 0 |  | - |  | GW697996 |
|  | Otpt1_0542_CZ1835_068.ab1 | 1 | TINY-like protein; with AP2-domain ; DNA binding; ERF023 ethylene response factor | 706 | 25 | 5.96E-40 | 74.76% | 3 | F:transcription factor activity; P:regulation of transcription, DNA-dependent; C:transcription factor complex |  |  | GW697762 |
|  | Otpt1_0758_CZ1855_037.ab1 | 1 | EREBP4 ethylene-responsive element-binding protein; transcription factor AP2/EREBP family | 623 | 25 | 1.54E-56 | 86.24% | 0 |  | - |  | GW697838 |
|  | Otpt1_0088_HFY328_050.ab1 | 1 | PTAC2 (plastid transcriptionally active2); transcription factor for chloroplast chromosome | 634 | 13 | 4.56E-51 | 70.31% | 2 | C:nucleoid; C:plastid |  |  | GW697591 |
|  | Otpt1_1001_CH0101_023.ab1 | 1 | Homeodomain transcription factor class III HD-Zip protein; PHB family | 596 | 25 | 4.36E-18 | 88.00% | 6 | F:sequence-specific DNA binding; F:protein dimerization activity; F:transcription factor activity; C:mitochondrion; P:regulation of transcription, DNA-dependent; C:transcription factor complex |  |  | GW697924 |
|  | temperate.fasta.screen.Contig43 | 2 | Double-stranded DNA-binding family protein | 687 | 25 | 1.23E-34 | 82.12% | 1 | F:double-stranded DNA binding |  | Otpt1_0773_CZ1855_059.ab1; Otpt1_1167_CH0101_038.ab1 | GW697844  GW697998 |
|  | Otpt1_0861_CH0101_031.ab1 | 1 | DVL10/rotundifolia - weak similarity | 489 | 0 |  |  | 0 |  | - |  | GW697873 |
|  | Otpt1_0209_HFY330_063.ab1 | 1 | VCS (VARICOSE) nucleotide binding; with WD40 decapping of mRNA domain | 635 | 25 | 2.21E-13 | 58.16% | 1 | C:plastid |  |  | GW697638 |
|  |  |  |  |  |  |  |  |  |  |  |  |  |
|  | Otpt1_0037_HFY328_019.ab1 | 1 | Zinc finger (B-box type) family protein; transcription factor | 562 | 25 | 4.55E-40 | 69.64% | 3 | P:regulation of transcription; F:transcription factor activity; C:transcription factor complex |  |  | GW697573 |
|  | Otpt1_0115_HFY328_095.ab1 | 1 | Zinc finger (C2H2 type) family protein; transcription factor | 576 | 25 | 9.28E-47 | 82.64% | 5 | P:regulation of transcription; F:transcription factor activity; F:zinc ion binding; C:mitochondrion; C:transcription factor complex |  |  | GW697599 |
|  |  |  | **Histones** |  |  |  |  |  |  |  |  |  |
|  | Otpt1_1130_CH0101_031.ab1 | 1 | Histone deacetylase HD2a | 702 | 25 | 3.26E-22 | 75.44% | 3 | F:metal ion binding; C:intracellular; P:transcription |  |  | GW697978 |
|  | *Otpt1_0616_CZ1855_037.ab1 | 1 | Weakely similar to histone deacetylase Otpt1_1130 | 533 | 0 |  |  | 0 |  | - |  | GW697790 |
|  | Otpt1_1463_AM21_001.ab1 | 1 | Histone h1 | 602 | 25 | 6.24E-28 | 87.12% | 6 | C:nucleosome; F:DNA binding; P:nucleosome assembly; P:response to stress; C:nucleus; C:mitochondrion |  |  | GW698075 |
|  | temperate.fasta.screen.Contig85 | 3 | Histone h2a | 829 | 25 | 2.14E-40 | 98.68% | 5 | C:nucleosome; F:DNA binding; P:nucleosome assembly; C:nucleus; C:plastid |  | Otpt1_0505_CZ1835_061.ab1; Otpt1_0506_CZ1835_059.ab1; Otpt1_0307_CZ1835_010.ab1 | GW697744  GW697745  GW697676 |
|  | temperate.fasta.screen.Contig65 | 2 | Histone h2a | 736 | 25 | 1.19E-41 | 97.48% | 6 | C:nucleosome; F:DNA binding; P:nucleosome assembly; C:nucleus; C:plastid; C:mitochondrion |  | Otpt1_0842_CH0101_013.ab1; Otpt1_1427_CH0101_095.ab1 | GW697864  GW698062 |
|  | temperate.fasta.screen.Contig29 | 1 | Histone h2a | 656 | 25 | 3.94E-40 | 98.68% | 5 | C:nucleosome; F:DNA binding; P:nucleosome assembly; C:nucleus; C:plastid |  | Otpt1_0196_HFY330_044.ab1 | GW697635 |
|  | Otpt1_0163_HFY330_023.ab1 | 1 | Histone h2b | 753 | 25 | 6.50E-43 | 95.80% | 4 | C:nucleosome; F:DNA binding; P:nucleosome assembly; C:nucleus |  |  | GW697620 |
|  | temperate.fasta.screen.Contig71 | 2 | Histone h2b | 696 | 25 | 5.74E-46 | 99.84% | 4 | C:nucleosome; F:DNA binding; P:nucleosome assembly; C:nucleus | - | Otpt1_1050_CH0101_059.ab1; Otpt1_0673_CZ1855_072.ab1 | GW697943  GW697805 |
|  | Otpt1_1142_CH0101_032.ab1 | 1 | Histone h2b | 432 | 25 | 4.86E-22 | 100.00% | 4 | C:nucleosome; F:DNA binding; P:nucleosome assembly; C:nucleus | - |  | GW697985 |
|  | Otpt1_1154_CH0101_039.ab1 | 1 | Histone h3 | 719 | 25 | 2.41E-68 | 97.80% | 6 | C:nucleosome; F:DNA binding; P:nucleosome assembly; C:nucleus; C:plastid; C:mitochondrion |  |  | GW697993 |
|  | Otpt1_0733_CZ1855_019.ab1 | 1 | Histone h4 | 530 | 25 | 1.44E-39 | 99.64% | 4 | C:nucleosome; F:DNA binding; P:nucleosome assembly; C:nucleus |  |  | GW697831 |
|  | Otpt1_0965_CH0101_092.ab1 | 1 | Histone h4 | 526 | 25 | 7.44E-36 | 98.88% | 4 | C:nucleosome; F:DNA binding; P:nucleosome assembly; C:nucleus |  |  | GW697913 |
|  |  |  |  |  |  |  |  |  |  |  |  |  |
|  |  |  | **ROS scavenging and signaling** |  |  |  |  |  |  |  |  |  |
|  | Otpt1_0500_CZ1835_040.ab1 | 1 | Lactoylglutathione lyase family protein glyoxalase 1 family protein | 726 | 25 | 1.04E-74 | 76.88% | 1 | P:metabolic process |  |  | GW697739 |
|  | *Otpt1_0294_CZ1835_003.ab1 | 1 | Glutathione peroxidase; Phospholipid hydroperoxide glutathione peroxidase 1; chloroplast | 692 | 25 | 4.20E-91 | 89.48% | 8 | C:chloroplast envelope; P:response to oxidative stress; F:phospholipid-hydroperoxide glutathione peroxidase activity; P:oxidation reduction; C:stromule; F:glutathione peroxidase activity; P:glutathione metabolic process; P:peroxidase reaction | EC:1.11.1.12, EC:1.11.1.9, |  | GW697673 |
|  | *Otpt1_1358_CH0101_018.ab1 | 1 | glutathione peroxidase; phospholipid hydroperoxide glutathione peroxidase | 724 | 25 | 2.99E-82 | 88.40% | 7 | F:phospholipid-hydroperoxide glutathione peroxidase activity; F:glutathione peroxidase activity; C:cytoplasm; P:oxidation reduction; P:response to oxidative stress; P:glutathione metabolic process; P:peroxidase reaction | EC:1.11.1.9, |  | GW698036 |
|  | Otpt1_0086_HFY328_054.ab1 | 1 | Similar to GRF6 (G-BOX REGULATING FACTOR 6) in brassinosteroid mediated signaling | 687 | 25 | 6.86E-94 | 91.20% | 5 | P:response to cadmium ion; C:cell wall; C:chloroplast; C:plasma membrane; F:protein domain specific binding |  |  | GW697590 |
|  | Otpt1_1208_CH0101_069.ab1 | 1 | Fe-superoxide dismutase 2 precursor | 556 | 25 | 8.24E-55 | 81.08% | 6 | P:oxidation reduction; P:superoxide metabolic process; F:iron ion binding; F:superoxide dismutase activity; C:nucleoid; C:chloroplast | EC:1.15.1.1, |  | GW698014 |
|  | Otpt1_1514_AM21_040.ab1 | 1 | Fe-superoxide dismutase 2 precursor | 369 | 25 | 1.35E-35 | 84.92% | 10 | P:oxidation reduction; P:superoxide metabolic process; F:iron ion binding; F:superoxide dismutase activity; C:nucleoid; C:chloroplast; C:mitochondrion; F:oxidoreductase activity; F:metal ion binding; C:plasma membrane | 1.35E-35 |  | GW698097 |
|  | *Otpt1_0016_HFY328_007.ab1 | 1 | Peroxiredoxin q; thylakoid; thioredoxin reductase; antioxydant and protein folding | 713 | 25 | 5.99E-88 | 82.52% | 4 | F:peroxiredoxin activity; P:oxidation reduction; C:plastoglobule; F:protein binding | EC:1.11.1.15, |  | GW697565 |
|  | Otpt1_0828_CZ1855_081.ab1 | 1 | Glutathione s-transferase gst | 368 | 25 | 2.92E-19 | 71.84% | 3 | F:glutathione transferase activity; P:glutathione metabolic process; P:glutathione conjugation reaction | EC:2.5.1.18, |  | GW697859 |
|  | Otpt1_0530_CZ1835_069.ab1 | 1 | Glutathione s-transferase | 700 | 25 | 2.25E-47 | 78.52% | 10 | F:glutathione transferase activity; P:response to cadmium ion; C:plasma membrane; C:cell wall; C:stromule; C:chloroplast; C:thylakoid; C:apoplast; P:glutathione metabolic process; P:glutathione conjugation reaction | EC:2.5.1.18, |  | GW697756 |
|  | Otpt1_1400_CH0101_056.ab1 | 1 | Glutathione S-transferaseor Thioredoxin (TRX) superfamily; | 497 | 25 | 1.17E-79 | 81.84% | 5 | P:response to cadmium ion; F:glutathione transferase activity; C:plastid; P:glutathione metabolic process; P:glutathione conjugation reaction | EC:2.5.1.18, |  | GW698053 |
|  | temperate.fasta.screen.Contig46 | 2 | Glutaredoxin; arsenate reductase; Protein folding | 703 | 25 | 2.57E-35 | 79.08% | 4 | P:cell redox homeostasis; F:electron carrier activity; F:protein disulfide oxidoreductase activity; P:electron transport |  | Otpt1_0998_CH0101_027.ab1; Otpt1_1237_CH0101_083.ab1 | GW697923  GW698019 |
|  | Otpt1_1426_CH0101_066.ab1 | 1 | Peroxidase; endomembrane | 346 | 25 | 5.87E-15 | 87.16% | 10 | F:heme binding; P:oxidation reduction; F:iron ion binding; P:response to nematode; F:peroxidase activity; F:electron carrier activity; F:calcium ion binding; P:response to oxidative stress; P:peroxidase reaction; P:electron transport | EC:1.11.1.7, |  | GW698061 |
|  | Otpt1_1419_CH0101_078.ab1 | 1 | Very weak similarity to a peroxydase | 368 | 0 |  |  | 0 |  | - |  | GW698060 |
|  |  |  |  |  |  |  |  |  |  |  |  |  |
|  |  |  | **Unclassified** |  |  |  |  |  |  |  |  |  |
|  | Otpt1_0748_CZ1855_047.ab1 | 1 | Dienelactone hydrolase family protein | 752 | 25 | 7.83E-97 | 79.56% | 3 | F:hydrolase activity; C:nucleus; C:cytoplasm |  |  | GW697835 |
|  | Otpt1_0431_CZ1835_081.ab1 | 1 | Flowering locus t-like protein (FT), protein and phosphatidylethanolamine binding, photoperiod and flowering, cytoplasm and nucleus | 664 | 25 | 9.47E-66 | 82.12% | 0 |  | - |  | GW697717 |
|  | Otpt1_1069_CH0101_056.ab1 | 1 | Phosphate responsive 1 family; located in cell wall | 456 | 25 | 3.03E-32 | 86.56% | 2 | C:cytoplasmic membrane-bounded vesicle; C:cellulose and pectin-containing cell wall | - |  | GW697948 |
|  | Otpt1_0373_CZ1835_062.ab1 | 1 | CP5; membrane related protein | 599 | 25 | 2.92E-70 | 80.00% | 1 | P:biological_process | - |  | GW697699 |
|  | Otpt1_0517_CZ1835_060.ab1 | 1 | SOUL-like protein; Heme binding protein; | 662 | 25 | 3.95E-48 | 59.68% | 1 | P:biological_process | - |  | GW697748 |
|  | Otpt1_0924_CH0101_056.ab1 | 1 | 2-oxoglutarate-dependent dioxygenase | 547 | 25 | 6.35E-44 | 70.08% | 1 | F:oxidoreductase activity |  |  | GW697900 |
|  | Otpt1_1046_CH0101_034.ab1 | 1 | Ubiquinone biosynthesis; similar to Coenzyme Q9; electron transport; mitochondrion | 771 | 25 | 2.36E-67 | 65.04% | 1 | C:mitochondrion | - |  | GW697942 |
|  | Otpt1_0594_CZ1855_025.ab1 | 1 | Flowering promoting factor-like 1; plastid | 676 | 25 | 4.18E-48 | 78.76% | 2 | C:mitochondrion; C:plastid | - |  | GW697780 |
|  | Otpt1_1176_CH0101_059.ab1 | 1 | Ankyrin repeat family | 383 | 11 | 1.93E-10 | 61.55% | 3 | F:molecular_function; P:biological_process; F:protein binding | - |  | GW698003 |
|  | Otpt1_1525_AM21_059.ab1 | 1 | Zinc binding; unknown function | 542 | 25 | 1.32E-30 | 77.72% | 6 | F:metal ion binding; F:iron-sulfur cluster binding; C:organelle membrane; C:endoplasmic reticulum; C:membrane part; C:intracellular organelle part | - |  | GW698102 |
|  | Otpt1_0296_CZ1835_001.ab1 | 1 | BURP domain-containing protein; unknown function | 727 | 25 | 1.09E-31 | 62.28% | 0 |  | - |  | GW697674 |
|  | Otpt1_0637_CZ1855_057.ab1 | 1 | Cytochrome b5; electron carrier | 642 | 25 | 3.07E-42 | 73.24% | 4 | C:vacuole; F:transition metal ion binding; C:endoplasmic reticulum; C:membrane part |  |  | GW697796 |
|  | Otpt1_0801_CZ1855_065.ab1 | 1 | Cytochrome b5; weakely similar to Otpt1_0637 | 407 | 25 | 8.91E-24 | 83.72% | 8 | C:endoplasmic reticulum membrane; C:microsome; C:vacuole; C:cytoplasmic membrane-bounded vesicle; F:iron ion binding; F:heme binding; P:transport; C:integral to membrane |  |  | GW697852 |
|  | Otpt1_0470_CZ1835_019.ab1 | 1 | ATDAD1 defender against cell death protein; antiapoptosis | 691 | 25 | 3.15E-54 | 93.48% | 2 | C:integral to membrane; P:apoptosis |  |  | GW697729 |
|  | Otpt1_0432_CZ1835_096.ab1 | 1 | Diphenol oxidase; ; copper ion binding / oxidoreductase (IRX12/LAC4) with laccase activity; electron transport | 657 | 25 | 1.26E-46 | 85.60% | 4 | P:oxidation reduction; F:copper ion binding; F:laccase activity; P:electron transport | EC:1.10.3.2, |  | GW697718 |
|  | Otpt1_1100_CH0101_081.ab1 | 1 | ELF4 early flowering expressed; involved in photoperiod, red-fa-r-red and flowering time; nucleus | 568 | 25 | 1.08E-52 | 82.48% | 0 |  | - |  | GW697962 |
|  | Otpt1_0514_CZ1835_064.ab1 | 1 | ELF4-like4; early fruit | 681 | 25 | 2.20E-28 | 68.28% | 2 | F:molecular_function; P:biological_process | - |  | GW697747 |
|  | temperate.fasta.screen.Contig36 | 2 | PsAD1 | 408 | 3 | 1.63E-09 | 78.00% | 1 | C:plastid |  | Otpt1_0117_HFY328_091.ab1; Otpt1_0675_CZ1855_068.ab1 | GW697600  GW697807 |
|  | Otpt1_1371_CH0101_037.ab1 | 1 | GPI-anchored protein | 344 | 1 | 1.83E-08 | 79.00% | 0 |  | - |  | GW698041 |
|  | Otpt1_0326_CZ1835_017.ab1 | 1 | Harpin-induced protein 1; endomembrane system | 603 | 25 | 2.39E-43 | 59.80% | 1 | P:biological_process | - |  | GW697682 |
|  | Otpt1_1528_AM21_053.ab1 | 1 | Hydroxyproline-rich glycoprotein; unknown function | 530 | 13 | 8.20E-27 | 65.92% | 1 | P:biological_process | - |  | GW698103 |
|  | temperate.fasta.screen.Contig104 | 4 | Lectin ; metal ion and glycan binding protein | 1013 | 25 | 7.31E-79 | 69.12% | 2 | F:metal ion binding; F:cation binding |  | Otpt1_1057_CH0101_053.ab1; Otpt1_1531_AM21_049.ab1; Otpt1_0089_HFY328_079.ab1; Otpt1_0036_HFY328_021.ab1 | GW697944  GW698104  GW697592  GW697572 |
|  | temperate.fasta.screen.Contig39 | 2 | Similar to nodulin-related | 730 | 12 | 3.32E-12 | 58.67% | 2 | P:response to bacterium; P:response to salt stress | - | Otpt1_0155_HFY330_002.ab1; Otpt1_0272_HFY330_087.ab1 | GW697615  GW697660 |
|  | temperate.fasta.screen.Contig9 | 1 | Metallothionein type 1 ; zinc ion binding protein | 564 | 4 | 1.36E-07 | 79.00% | 1 | F:metal ion binding |  | Otpt1_1232_CH0101_087.ab1 | GW698018 |
|  | Otpt1_1031_CH0101_037.ab1 | 1 | Metallothionein-like protein | 560 | 25 | 1.14E-19 | 79.08% | 1 | F:metal ion binding |  |  | GW697937 |
|  | temperate.fasta.screen.Contig15 | 1 | Metallothionein-like protein type-1 | 509 | 12 | 6.80E-09 | 82.17% | 1 | F:metal ion binding |  | Otpt1_0598_CZ1855_021.ab1 | GW697782 |
|  | temperate.fasta.screen.Contig10 | 1 | Metallothionein-like protein type-3 | 471 | 25 | 7.55E-23 | 77.92% | 1 | F:metal ion binding |  | Otpt1_0498_CZ1835_044.ab1 | GW697738 |
|  | temperate.fasta.screen.Contig105 | 4 | Metallothionein-like protein type-3 | 446 | 25 | 6.45E-22 | 77.20% | 1 | F:metal ion binding |  | Otpt1_1239_CH0101_081.ab1; Otpt1_0482_CZ1835_020.ab1; Otpt1_0644_CZ1855_051.ab1; Otpt1_0025_HFY328_010.ab1 | GW698020  GW697734  GW697797  GW697567 |
|  | temperate.fasta.screen.Contig68 | 2 | Type-a response regulator; hormone mediated signal transduction and transcriptional response | 728 | 25 | 5.19E-58 | 87.80% | 6 | P:two-component signal transduction system (phosphorelay); F:DNA binding; F:two-component response regulator activity; F:protein binding; P:response to cytokinin stimulus; P:regulation of transcription, DNA-dependent | - | Otpt1_1035_CH0101_048.ab1; Otpt1_1266_CH0101_008.ab1 | GW697940  GW698031 |
|  | Otpt1_0097_HFY328_067.ab1 | 1 | RS21-C6 protein; mazG nucleotide pyrophosphohydrolase domain protein | 536 | 25 | 5.14E-48 | 84.88% | 0 |  | - |  | GW697593 |
|  | Otpt1_0948_CH0101_070.ab1 | 1 | Similar to ABOUTDESOUFFLE; mitochondrial carrier protein; carnitine/acylcarnitine | 526 | 25 | 8.68E-77 | 73.84% | 5 | F:binding; C:mitochondrial inner membrane; P:transport; C:chloroplast; F:transporter activity |  |  | GW697910 |
|  | temperate.fasta.screen.Contig89 | 3 | Nicotianamine synthase | 813 | 25 | 1.28E-91 | 73.20% | 3 | F:transferase activity; F:nicotianamine synthase activity; P:nicotianamine biosynthetic process | - | Otpt1_0292_CZ1835_007.ab1; Otpt1_0481_CZ1835_022.ab1; Otpt1_0429_CZ1835_085.ab1 | GW697672  GW697733  GW697716 |
|  | Otpt1_0814_CZ1855_068.ab1 | 1 | Pollen-specific protein | 636 | 25 | 6.22E-64 | 69.96% | 0 |  | - |  | GW697855 |
|  | Otpt1_0546_CZ1835_091.ab1 | 1 | Protein kinase c inhibitor; zinc binding protein | 626 | 25 | 2.11E-53 | 86.72% | 2 | F:zinc ion binding; F:catalytic activity |  |  | GW697766 |
|  | Otpt1_0073_HFY328_057.ab1 | 1 | SHOOT1 protein; chloroplast thylakoid membrane, protein binding | 617 | 25 | 1.17E-64 | 76.12% | 2 | F:protein binding; C:plastid |  |  | GW697585 |
|  | Otpt1_0476_CZ1835_028.ab1 | 1 | Short-chain dehydrogenase reductase family protein | 628 | 25 | 1.92E-70 | 77.20% | 2 | F:oxidoreductase activity; P:defense response |  |  | GW697732 |
|  | temperate.fasta.screen.Contig82 | 3 | Specific tissue protein 2; 6 repeats of 84 bp | 819 | 9 | 2.24E-20 | 45.11% | 0 |  | - | Otpt1_1184_CH0101_049.ab1; Otpt1_0796_CZ1855_075.ab1; Otpt1_0398_CZ1835_077.ab1 | GW698005  GW697850  GW697706 |
|  | temperate.fasta.screen.Contig103 | 4 | Specific tissue protein 2; 3 repeats of 78 bp | 737 | 16 | 4.12E-38 | 60.31% | 0 |  | - | Otpt1_0945_CH0101_074.ab1; Otpt1_1464_AM21_016.ab1; Otpt1_0265_HFY330_070.ab1; Otpt1_0420_CZ1835_068.ab1 | GW697909  GW698076  GW697654  GW697711 |
|  | temperate.fasta.screen.Contig35 | 2 | Specific tissue protein 2; 3 imperfect repeats of 78 bp | 721 | 19 | 3.33E-25 | 56.84% | 0 |  | - | Otpt01_0008_CZ1321_058.ab1; Otpt1_1454_CH0101_082.ab1 | GW698114  GW698069 |
|  | temperate.fasta.screen.Contig5 | 1 | Specific tissue protein 2 | 664 | 9 | 1.87E-13 | 45.78% | 0 |  | - | Otpt1_0770_CZ1855_034.ab1 | GW697841 |
|  | Otpt1_0899_CH0101_038.ab1 | 1 | Hypothetical protein; endomembrane system | 567 | 10 | 5.96E-27 | 75.30% | 1 | P:biological_process | - |  | GW697889 |
|  | Otpt1_0664_CZ1855_071.ab1 | 1 | Hypothetical protein; SWIB complex BAF60b domain-containing protein | 689 | 3 | 7.51E-08 | 62.00% | 0 |  | - |  | GW697802 |
|  | Otpt1_1195_CH0101_056.ab1 | 1 | Hypothetical protein; Endomembrane system | 770 | 11 | 8.96E-35 | 73.64% | 1 | P:biological_process |  |  | GW698008 |
|  | Otpt1_0256_HFY330_080.ab1 | 1 | Hypothetical protein | 636 | 25 | 2.88E-69 | 77.60% | 2 | F:molecular_function; P:biological_process | - |  | GW697651 |
|  | Otpt1_0698_CZ1855_086.ab1 | 1 | Hypothetical protein; chloroplast; unknown function; | 600 | 7 | 2.02E-10 | 72.43% | 1 | P:biological_process | - |  | GW697818 |
|  | temperate.fasta.screen.Contig51 | 2 | Hypothetical protein; unknown function | 1082 | 25 | 3.56E-143 | 73.24% | 2 | C:plastid; C:membrane |  | Otpt1_1106_CH0101_092.ab1; Otpt1_1093_CH0101_093.ab1 | GW697964  GW697958 |
|  | Otpt1_0858_CH0101_006.ab1 | 1 | Hypothetical protein; unknown funcion | 445 | 7 | 1.35E-11 | 79.71% | 2 | C:plastid; C:membrane |  |  | GW697871 |
|  | Otpt1_0270_HFY330_091.ab1 | 1 | Hypothetical protein; unknown function | 685 | 20 | 8.18E-23 | 60.10% | 1 | C:plastid | - |  | GW697658 |
|  | *Otpt1_0918_CH0101_064.ab1 | 1 | Hypothetical protein; chloroplast thylakoid membrane; drought stress response | 679 | 20 | 7.49E-29 | 82.00% | 1 | C:plastid | - |  | GW697896 |
|  | Otpt1_0445_CZ1835_013.ab1 | 1 | Hypothetical protein; unknown function | 732 | 25 | 1.20E-50 | 72.32% | 1 | P:biological_process | - |  | GW697721 |
|  | Otpt1_0236_HFY330_056.ab1 | 1 | Hypothetical protein; unknown function | 672 | 25 | 2.05E-55 | 70.72% | 3 | C:plastid; F:molecular_function; P:biological_process | - |  | GW697644 |
|  | Otpt1_1484_AM21_030.ab1 | 1 | Hypothetical protein; unknown function | 531 | 1 | 3.66E-06 | 62.00% | 0 |  | - |  | GW698086 |
|  | temperate.fasta.screen.Contig7 | 1 | Hypothetical protein | 624 | 0 |  |  | 0 |  | - | Otpt1_1064_CH0101_060.ab1 | GW697946 |
|  | temperate.fasta.screen.Contig72 | 2 | Hypothetical protein | 624 | 0 |  |  | 0 |  | - | Otpt1_0674_CZ1855_070.ab1; Otpt1_0761_CZ1855_048.ab1 | GW697806  GW697839 |
|  | Otpt1_0274_HFY330_083.ab1 | 1 | Hypothetical protein | 645 | 1 | 9.44E-06 | 60.00% | 0 |  | - |  | GW697662 |
|  | Otpt1_0704_CZ1855_013.ab1 | 1 | Hypothetical protein | 450 | 12 | 1.17E-07 | 86.50% | 0 |  | - |  | GW697822 |
|  | Otpt1_1467_AM21_010.ab1 | 1 | Hypothetical protein | 725 | 25 | 8.22E-48 | 75.72% | 1 | C:cytoplasmic membrane-bounded vesicle | - |  | GW698079 |
|  | temperate.fasta.screen.Contig78 | 2 | Hypothetical protein | 398 | 0 |  |  | 0 |  | - | Otpt1_1156_CH0101_035.ab1; Otpt1_1242_CH0101_094.ab1 | GW697994  GW698021 |
|  | Otpt1_1255_CH0101_007.ab1 | 1 | Hypothetical protein , similar serine acetyltransferase and to Salmonella genome | 475 | 25 | 1.08E-37 | 74.72% | 0 |  | - |  | GW698028 |
|  | temperate.fasta.screen.Contig112 | 6 | Hypothetical protein 71 Cicer | 578 | 1 | 2.38E-18 | 76.00% | 0 |  | - | Otpt1_0195_HFY330_046.ab1; Otpt1_0336_CZ1835_020.ab1; Otpt1_0140_HFY330_005.ab1; Otpt1_0503_CZ1835_034.ab1; Otpt1_0174_HFY330_026.ab1; Otpt1_1121_CH0101_016.ab1 | GW697634  GW697687  GW697610  GW697742  GW697625  GW697974 |
|  | temperate.fasta.screen.Contig113 | 6 | Hypothetical protein 71 Cicer | 555 | 1 | 4.72E-18 | 76.00% | 0 |  | - | Otpt1_0936_CH0101_071.ab1; Otpt1_1491_AM21_020.ab1; Otpt1_0680_CZ1855_089.ab1; Otpt1_0854_CH0101_012.ab1; Otpt1_1173_CH0101_063.ab1; Otpt1_0501_CZ1835_038.ab1 | GW697903  GW698090  GW697809  GW697869  GW698001  GW697740 |
|  | Otpt1_1445_CH0101_094.ab1 | 1 | Cyclin-like F-box (weak similarity) | 723 | 0 |  |  | 0 |  | - |  | GW698064 |
|  | Otpt01_0004_CZ1321_057.ab1 | 1 | F-box family protein | 246 | 7 | 1.04E-16 | 66.00% | 0 |  | - |  | GW698113 |
|  | temperate.fasta.screen.Contig75 | 2 | F-box family protein | 781 | 4 | 6.62E-41 | 56.00% | 2 | F:molecular_function; P:biological_process | - | Otpt1_0702_CZ1855_082.ab1; Otpt1_0703_CZ1855_015.ab1 | GW697820  GW697821 |
|  | Otpt1_0795_CZ1855_077.ab1 | 1 | hit soybean and medicago genomes | 754 | 1 |  |  | 0 |  | - |  | GW697849 |
|  | Otpt1_0993_CH0101_004.ab1 | 1 | hit soybean and medicago genomes | 641 | 0 |  |  | 0 |  | - |  | GW697922 |
|  | temperate.fasta.screen.Contig11 | 1 | hit soybean and populus genomes | 689 | 0 |  |  | 0 |  | - | Otpt1_0931_CH0101_079.ab1 | GW697901 |
|  | temperate.fasta.screen.Contig14 | 1 | hit soybean and populus genomes | 668 | 0 |  |  | 0 |  | - | Otpt1_1448_CH0101_090.ab1 | GW698066 |
|  | Otpt1_1152_CH0101_043.ab1 | 1 | hit soybean and populus genomes | 666 | 0 |  |  | 0 |  | - |  | GW697991 |
|  | Otpt1_1251_CH0101_015.ab1 | 1 | hit soybean and populus genomes | 585 | 0 |  |  | 0 |  | - |  | GW698026 |
|  | temperate.fasta.screen.Contig100 | 4 | hit to soybean genome | 544 | 0 |  |  | 0 |  | - | Otpt1_1096_CH0101_087.ab1; Otpt1_1101_CH0101_096.ab1; Otpt1_0207_HFY330_036.ab1; Otpt1_0142_HFY330_001.ab1 | GW697959  GW697963  GW697636  GW697611 |
|  | temperate.fasta.screen.Contig74 | 2 | hit to soybean genome | 637 | 0 |  |  | 0 |  | - | Otpt1_0237_HFY330_054.ab1; Otpt1_0038_HFY328_017.ab1 | GW697645  GW697574 |
|  | temperate.fasta.screen.Contig44 | 2 | hit to soybean genome | 473 | 0 |  |  | 0 |  | - | Otpt1_1499_AM21_041.ab1; Otpt1_0538_CZ1835_072.ab1 | GW698092  GW697760 |
|  | temperate.fasta.screen.Contig73 | 2 | hit to soybean genome | 421 | 0 |  |  | 0 |  | - | Otpt1_0444_CZ1835_015.ab1; Otpt1_1118_CH0101_005.ab1 | GW697720  GW697971 |
|  | Otpt1_1540_AM21_052.ab1 | 1 | hit to soybean genome | 691 | 0 |  |  | 0 |  | - |  | GW698108 |
|  | Otpt1_1024_CH0101_047.ab1 | 1 | hit to soybean genome | 619 | 0 |  |  | 0 |  | - |  | GW697932 |
|  | Otpt1_0362_CZ1835_063.ab1 | 1 | hit to soybean genome | 605 | 0 |  |  | 0 |  | - |  | GW697694 |
|  | Otpt1_0977_CH0101_013.ab1 | 1 | hit to soybean genome | 595 | 0 |  |  | 0 |  | - |  | GW697916 |
|  | Otpt1_0168_HFY330_017.ab1 | 1 | Mitochondrial protein | 229 | 0 |  |  | 0 |  | - |  | GW697623 |
|  |  |  |  |  |  |  |  |  |  |  |  |  |
|  |  |  | **Unknown** |  |  |  |  |  |  |  |  |  |
|  | temperate.fasta.screen.Contig53 | 2 | NA | 701 | 0 |  |  | 0 |  | - | Otpt1_1451_CH0101_088.ab1; Otpt1_0567_CZ1855_011.ab1 | GW698067  GW697774 |
|  | Otpt1_1451_CH0101_088.ab1 | 1 | NA | 701 | 0 |  |  | 0 |  | - |  |  |
|  | Otpt1_0567_CZ1855_011.ab1 | 1 | NA | 533 | 0 |  |  | 0 |  | - |  |  |
|  | temperate.fasta.screen.Contig66 | 2 | NA | 754 | 0 |  |  | 0 |  | - | Otpt1_0422_CZ1835_095.ab1; Otpt1_0360_CZ1835_036.ab1 | GW697712  GW697692 |
|  | temperate.fasta.screen.Contig28 | 1 | NA | 655 | 0 |  |  | 0 |  | - | Otpt1_0158_HFY330_029.ab1 | GW697617 |
|  | temperate.fasta.screen.Contig19 | 1 | NA | 635 | 0 |  |  | 0 |  | - | Otpt1_0466_CZ1835_027.ab1 | GW697726 |
|  | temperate.fasta.screen.Contig58 | 2 | NA | 570 | 0 |  |  | 0 |  | - | Otpt1_0739_CZ1855_032.ab1; Otpt1_0067_HFY328_038.ab1 | GW697833  GW697581 |
|  | temperate.fasta.screen.Contig69 | 2 | NA | 379 | 0 |  |  | 0 |  | - | Otpt1_1120_CH0101_001.ab1; Otpt1_1163_CH0101_044.ab1 | GW697973  GW697997 |
|  | Otpt1_0352_CZ1835_046.ab1 | 1 | NA | 706 | 0 |  |  | 0 |  | - |  | GW697690 |
|  | Otpt1_0611_CZ1855_047.ab1 | 1 | NA | 673 | 0 |  |  | 0 |  | - |  | GW697789 |
|  | Otpt1_0250_HFY330_067.ab1 | 1 | NA | 589 | 0 |  |  | 0 |  | - |  | GW697650 |
|  | Otpt1_0028_HFY328_004.ab1 | 1 | NA | 548 | 0 |  |  | 0 |  | - |  | GW697568 |
|  | Otpt1_1521_AM21_063.ab1 | 1 | NA | 469 | 0 |  |  | 0 |  | - |  | GW698100 |
|  | Otpt1_0782_CZ1855_051.ab1 | 1 | NA | 440 | 0 |  |  | 0 |  | - |  | GW697845 |
|  | Otpt1_0839_CZ1855_082.ab1 | 1 | NA | 422 | 0 |  |  | 0 |  | - |  | GW697863 |
|  | Otpt1_0302_CZ1835_014.ab1 | 1 | NA | 414 | 0 |  |  | 0 |  | - |  | GW697675 |
|  | Otpt1_0886_CH0101_045.ab1 | 1 | NA | 413 | 0 |  |  | 0 |  | - |  | GW697881 |
|  | Otpt1_1243_CH0101_092.ab1 | 1 | NA | 410 | 0 |  |  | 0 |  | - |  | GW698022 |
|  | Otpt01_0003_CZ1321_042.ab1 | 1 | NA | 399 | 0 |  |  | 0 |  | - |  | GW698112 |
|  | Otpt1_1060_CH0101_064.ab1 | 1 | NA | 370 | 0 |  |  | 0 |  | - |  | GW697945 |
|  | Otpt1_0898_CH0101_040.ab1 | 1 | NA | 327 | 0 |  |  | 0 |  | - |  | GW697888 |
|  | Otpt1_0892_CH0101_035.ab1 | 1 | NA | 299 | 0 |  |  | 0 |  | - |  | GW697883 |
|  | Otpt1_0461_CZ1835_006.ab1 | 1 | NA | 275 | 0 |  |  | 0 |  | - |  | GW697723 |
|  | Otpt1_0286_HFY330_084.ab1 | 1 | NA | 273 | 0 |  |  | 0 |  | - |  | GW697668 |
|  | Otpt1_0062_HFY328_046.ab1 | 1 | NA | 234 | 0 |  |  | 0 |  | - |  | GW697578 |
|  | Otpt1_0173_HFY330_028.ab1 | 1 | NA | 201 | 0 |  |  | 0 |  | - |  | GW697624 |
|  | Otpt1_0012_HFY328_013.ab1 | 1 | NA | 193 | 0 |  |  | 0 |  | - |  |  |
|  | Otpt1_0187_HFY330_039.ab1 | 1 | NA | 171 | 0 |  |  | 0 |  | - |  |  |

A vertical line before the first column indicates that adjacent contigs have similar sequence.
